# Supplementary material for: Synthesis of N-triflyl aldimines catalyzed by imino-λ3-iodane
Source: Royal Society of Chemistry journal article supplement (doi:10.1039/d4qo00875h), 2024-01-01

## Supplementary Information

### Synthesis of *N*-triflyl aldimines catalyzed by imino- $\lambda^3$ -iodane

Shun Sunagawa,<sup>a</sup> Yoko Tezuka,<sup>a</sup> Akira Tsubouchi,<sup>a</sup> Akira Yoshimura<sup>b</sup> and Akio Saito<sup>\*,a</sup>

<sup>a</sup> Division of Applied Chemistry, Institute of Engineering, Tokyo University of Agriculture and Technology, Koganei, Tokyo 184-8588, Japan.

<sup>b</sup> Faculty of Pharmaceutical Sciences, Aomori University, 2-3-1 Kobata, Aomori 030-0943, Japan.

\* Correspondence: akio-sai@cc.tuat.ac.jp; Tel.: +81-42-388-7667

#### *Table of contents*

1. Optimization of Reaction Conditions (Table S1).....S1
2. General Information.....S2
3. Preparation and Characterization of *N*-Tryflylamine **4a-4l** and *N-p*-Nosylamine **6**.....S2
4. Other Conversion Reactions of *N*-Tryflylimine **3a**.....S4
5. <sup>1</sup>H and <sup>13</sup>C NMR Spectra of **4a-4h** and **6-9**.....S6
6. <sup>19</sup>F NMR Spectra of **4a-4h** and **6-9**.....S22

## 1. Optimization of Reaction Conditions

Table S1. Evaluation of iodine reagents, additives and solvents.

$\text{Ph-CHO (2a)} \xrightarrow[\text{MS3A / Solvent}]{\text{1 or other (20 mol\%)} \text{ TfNH}_2 \text{ (1.5 eq.)}}$ 
 $\left[ \text{Ph-CH=N-Tf (3a)} \right] \xrightarrow[\text{Solvent-MeOH, rt, 1 h}]{\text{NaBH}_4 \text{ (3.0 eq.)}}$ 
 $\text{Ph-CH}_2\text{-NHTf (4a)} \left( \text{Ph-CH}_2\text{-OH (5a)} \right)$

| entry           | Catalyst                           | R <sub>n</sub> ( <b>1a-1j</b> )    | MS3A (mg) | Solvent                         | Temp. (°C) | Time (h) | <b>4a<sup>a</sup></b> (%) | <b>5a<sup>a</sup></b> (%) |
|-----------------|------------------------------------|------------------------------------|-----------|---------------------------------|------------|----------|---------------------------|---------------------------|
| 1               | <b>1a</b>                          | H                                  | 120       | CHCl <sub>3</sub>               | 50         | 24       | 19                        | 65                        |
| 2               | <b>1b</b>                          | 4-Me                               | 120       | CHCl <sub>3</sub>               | 50         | 24       | 39                        | 45                        |
| 3               | <b>1c</b>                          | 2-Me                               | 120       | CHCl <sub>3</sub>               | 50         | 24       | 22                        | 67                        |
| 4               | <b>1d</b>                          | 4-OMe                              | 120       | CHCl <sub>3</sub>               | 50         | 24       | 30                        | 58                        |
| 5               | <b>1e</b>                          | 2-OMe                              | 120       | CHCl <sub>3</sub>               | 50         | 24       | 65                        | 35                        |
| 6               | <b>1f</b>                          | 4-Cl                               | 120       | CHCl <sub>3</sub>               | 50         | 24       | 24                        | 46                        |
| 7               | <b>1g</b>                          | 4-CF <sub>3</sub>                  | 120       | CHCl <sub>3</sub>               | 50         | 24       | 20                        | 56                        |
| 8               | <b>1h</b>                          | 2-NO <sub>2</sub>                  | 120       | CHCl <sub>3</sub>               | 50         | 24       | 18                        | 61                        |
| 9               | <b>1i</b>                          | F <sub>5</sub>                     | 120       | CHCl <sub>3</sub>               | 50         | 24       | 18                        | 61                        |
| 10              | <b>1j</b>                          | 2-CO <sub>2</sub> NMe <sub>2</sub> | 120       | CHCl <sub>3</sub>               | 50         | 24       | 2                         | 87                        |
| 11              | <b>1k</b>                          | -                                  | 120       | CHCl <sub>3</sub>               | 50         | 24       | trace                     | 84                        |
| 12              | <b>1l</b>                          | -                                  | 120       | CHCl <sub>3</sub>               | 50         | 24       | trace                     | 85                        |
| 13              | BF <sub>3</sub> ·Et <sub>2</sub> O | -                                  | 120       | CHCl <sub>3</sub>               | 50         | 24       | 0                         | 90                        |
| 14              | -                                  | -                                  | 120       | CHCl <sub>3</sub>               | 50         | 24       | 0                         | 93                        |
| 15              | <b>1e</b>                          | 2-OMe                              | 120       | MeCN                            | 50         | 24       | 3                         | 96                        |
| 16              | <b>1e</b>                          | 2-OMe                              | 120       | CHCl <sub>3</sub>               | rt         | 4        | 50                        | 31                        |
| 17              | <b>1e</b>                          | 2-OMe                              | 120       | CH <sub>2</sub> Cl <sub>2</sub> | rt         | 2        | 66                        | 29                        |
| 18              | <b>1e</b>                          | 2-OMe                              | 120       | Hexane                          | rt         | 2        | 60                        | 37                        |
| 19              | <b>1e</b>                          | 2-OMe                              | 120       | Toluene                         | rt         | 2        | 62                        | 27                        |
| 20              | <b>1e</b>                          | 2-OMe                              | 120       | HFIP <sup>b</sup>               | rt         | 2        | 0                         | 97                        |
| 21              | <b>1e</b>                          | 2-OMe                              | 360       | CH <sub>2</sub> Cl <sub>2</sub> | rt         | 4        | 94                        | 6                         |
| 22 <sup>c</sup> | <b>1e</b>                          | 2-OMe                              | 360       | CH <sub>2</sub> Cl <sub>2</sub> | rt         | 4        | 94                        | (86) <sup>d</sup>         |
| 23              | -                                  | -                                  | 360       | CH <sub>2</sub> Cl <sub>2</sub> | rt         | 4        | 0                         | 98                        |
| 24              | TiO <sub>2</sub>                   | -                                  | -         | CH <sub>2</sub> Cl <sub>2</sub> | rt         | 3        | 0                         | 99                        |

<sup>a</sup> Determined by <sup>1</sup>H NMR analysis using an internal standard. **2a**: 0.4 mmol. <sup>b</sup> HFIP = 1,1,1,3,3,3-hexafluoro-2-propanol. <sup>c</sup> **1g**: 10 mol%. <sup>d</sup> Isolated yield.

## 2. General Information

All reactions were carried out under an argon atmosphere. According to procedures reported in the literatures, iodosylarenes **1a-1j**<sup>1a</sup> or **1k**<sup>1b</sup> and **1l**<sup>1c</sup> were prepared from the corresponding (diacetoxyiodo)arenes<sup>1d</sup> or iodoarenes. Triflylamide (TfNH<sub>2</sub>), *p*-nosylamide (*p*-NsNH<sub>2</sub>) and carbonyls **2a-2o** are commercially available. All solvents were purchased as the “anhydrous” and used without further purification. For the thin-layer chromatography (TLC) analysis, Merck precoated TLC plates (silica gel 60 F<sub>254</sub>) were used. Column chromatography was performed on silica gel 60N (63-200 μm, neutral, Kanto Kagaku Co., Ltd.). Preparative thin layer chromatography (PTLC) was performed on Wakogel® B-5F (FUJIFILM Wako Pure Chemical Corp.). Medium pressure liquid chromatography (MPLC) was carried out with YAMAZEN EPCLC-Wprep 2XY.

<sup>1</sup>H, <sup>19</sup>F and <sup>13</sup>C NMR spectra were measured at 500, 470 and 125 MHz in CDCl<sub>3</sub> and the chemical shifts are given in ppm using CHCl<sub>3</sub> (7.26 ppm) in CDCl<sub>3</sub> for <sup>1</sup>H NMR, using C<sub>6</sub>F<sub>6</sub> (-162.9) for <sup>19</sup>F NMR and using CDCl<sub>3</sub> (77.0 ppm) for <sup>13</sup>C NMR as an internal standard, respectively. Splitting patterns of an apparent multiplet associated with an averaged coupling constant were designed as s (singlet), d (doublet), t (triplet), q (quartet), m (multiplet), and br (broadened). Mass spectra and HRMS were recorded on double-focusing magnetic sector by FAB or ESI methods.

## 3. Preparation and Characterization of *N*-Triflylamine **4a-4l** and *N*-*p*-Nosylamine **6**

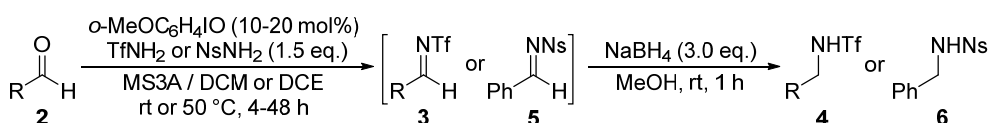

To a suspension of 1-iodosyl-2-methoxybenzene (10.0 mg, 0.04 mmol for **4a**, **4d** and **4f-4l**; 20.0 mg, 0.08 mmol for **4b**, **4c** and **4e**) and MS3A (360 mg) in dichloromethane (DCM, 1.0 mL for **4a** and **4c-4l**) or 1,2-dichloroethane (DCE, 1.0 mL for **4b**) was added TfNH<sub>2</sub> (89.5 mg, 0.6 mmol) or *p*-NsNH<sub>2</sub> (121.4 mg, 0.6 mmol) and aldehyde **2** (0.4 mmol) at room temperature. After the reaction mixture was stirred at same temperature (for **4a** and **4c-4l**) or 50 °C (for **4b** and **6**) for 4-48 h, NaBH<sub>4</sub> (45.4 mg, 1.2 mmol) and methanol (1.0 mL) were added at 0 °C. The reaction mixture was stirred at room temperature for 1 h and then was filtered through celite pad. The filtrate was quenched with H<sub>2</sub>O and extracted with DCM. The organic layer was dried over MgSO<sub>4</sub> and concentrated in vacuo to dryness. The residue was purified by PTLC to give **4a-4l** and **6**.

**Scale-up experiment:** To a suspension of 1-iodosyl-2-methoxybenzene (50.0 mg, 0.2 mmol) stirred for 15 minutes in the presence of MS3A (1.8 g) in dichloromethane (DCM, 5.0 mL) was added TfNH<sub>2</sub> (447.3 mg, 3.0 mmol) and aldehyde **2a** (202 μL, 2.0 mmol) at room temperature. After the reaction mixture was stirred at same temperature for 4 h, NaBH<sub>4</sub> (227 mg, 6.0 mmol) and methanol (5.0 mL) were added at 0 °C. The reaction mixture was stirred at room temperature for 1 h and then was filtered through celite pad. The filtrate was quenched with H<sub>2</sub>O and extracted with DCM. The organic layer was dried over MgSO<sub>4</sub> and concentrated in vacuo to dryness. The residue was purified by silica gel chromatography (hexane:AcOEt = 9:1) to give **4a** (409.3 mg, 86%) as a white solid.

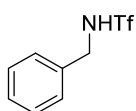

***N*-Benzyl-1,1,1-trifluoromethanesulfonamide (**4a**):** 86% (82.1 mg). *R*<sub>f</sub> = 0.61 (hexane:AcOEt = 3:1). White solid. <sup>1</sup>H NMR (500 MHz, CDCl<sub>3</sub>) δ ppm; 7.57-7.29 (m, 5H), 5.03 (brs, 1H), 4.45 (d, *J* = 5.2 Hz, 2H). <sup>13</sup>C NMR (125 MHz, CDCl<sub>3</sub>) δ ppm; 135.1, 129.1, 128.6, 127.8, 119.6 (q, *J*<sub>CF</sub> = 321.1 Hz), 48.2. <sup>19</sup>F NMR (470 MHz, CDCl<sub>3</sub>) δ ppm; -78.3 (s, 3F). The <sup>1</sup>H, <sup>19</sup>F and <sup>13</sup>C NMR spectra of the product were identical to those reported in the literature.<sup>2a</sup>

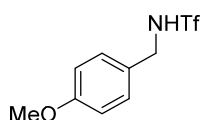

**1,1,1-Trifluoro-*N*-(4-methoxybenzyl)methanesulfonamide (**4b**):** 76% (81.9 mg). *R*<sub>f</sub> = 0.53 (hexane:AcOEt = 3:1). White solid. Mp 66-68 °C. IR (KBr) ν cm<sup>-1</sup>; 3187, 1612, 1515, 1444, 1373, 1232, 1181, 1147, 1047, 817, 616. <sup>1</sup>H NMR (500 MHz, CDCl<sub>3</sub>) δ ppm; 7.25 (d, *J* = 9.2 Hz, 2H), 6.90 (d, *J* = 9.2 Hz, 2H), 4.99 (brs, 1H), 4.38 (d, *J* = 5.7 Hz, 2H), 3.82 (s, 3H). <sup>13</sup>C NMR (125 MHz, CDCl<sub>3</sub>) δ ppm; 159.7, 129.4, 127.2, 119.7 (q, *J*<sub>CF</sub> = 321.1 Hz), 114.4, 55.3, 47.8. <sup>19</sup>F NMR (470 MHz, CDCl<sub>3</sub>) δ ppm; -78.3 (s, 3F). HRMS (FAB, *m/z*): calcd. for C<sub>9</sub>H<sub>10</sub>F<sub>3</sub>NO<sub>3</sub>S [M] 269.0333; found, 269.0337.

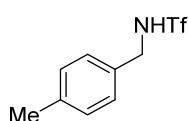

**1,1,1-Trifluoro-*N*-(4-methylbenzyl)methanesulfonamide (**4c**):** 92% (93.2 mg). *R*<sub>f</sub> = 0.61 (hexane:AcOEt = 3:1). White solid. <sup>1</sup>H NMR (500 MHz, CDCl<sub>3</sub>) δ ppm; 7.21 (d, *J* = 8.0 Hz, 2H), 7.20 (d, *J* = 8.0 Hz, 2H), 4.99 (brs, 1H), 4.40 (d, *J* = 5.7 Hz, 2H), 2.36 (s, 3H). <sup>13</sup>C NMR (125 MHz, CDCl<sub>3</sub>) δ ppm; 138.6, 132.1, 129.7, 127.8, 119.7 (q, *J*<sub>CF</sub> = 321.1 Hz), 48.0, 21.1. <sup>19</sup>F NMR

<sup>1</sup> (a) A. Maity, S.-M. Hyun and D. C. Powers, *Nat. Chem.*, 2018, **10**, 200; (b) S. Sunagawa, F. Morisaki, T. Baba, A. Tsubouchi, A. Yoshimura, K. Miyamoto, M. Uchiyama and A. Saito, *Org. Lett.*, 2022, **24**, 5230; (c) L. Kraszkiewicz and L. Skulski, *ARKIVOC*, 2003, 120; (d) A. Watanabe, K. Miyamoto, T. Okada, T. Asawa and M. Uchiyama, *J. Org. Chem.*, 2018, **83**, 14262.

<sup>2</sup> (a) A. U. Meyer, A. L. Berger and B. König, *Chem. Commun.*, 2016, **52**, 10918; (b) X. Wang, T.-S. Mei and J.-Q. Yu, *J. Am. Chem. Soc.*, 2009, **131**, 7520; (c) R. Pirwerdjan, P. Becker and C. Bolm, *Org. Lett.*, 2015, **17**, 5008.

(470 MHz, CDCl<sub>3</sub>)  $\delta$  ppm; -78.3 (s, 3F). The <sup>1</sup>H and <sup>13</sup>C NMR spectra of the product were identical to those reported in the literature.<sup>2b</sup>

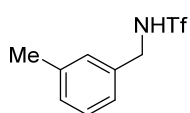

**1,1,1-Trifluoro-N-(3-methylbenzyl)methanesulfonamide (4d):** 84% (85.0 mg).  $R_f = 0.70$  (hexane:AcOEt = 3:1). White solid. <sup>1</sup>H NMR (500 MHz, CDCl<sub>3</sub>)  $\delta$  ppm; 7.28 (dd,  $J = 7.5, 7.5$  Hz, 1H), 7.17 (d,  $J = 7.5$  Hz, 1H), 7.14 (s, 1H), 7.12 (d,  $J = 7.5$  Hz, 1H), 4.95 (brs, 1H), 4.41 (d,  $J = 5.7$  Hz, 2H), 2.37 (s, 3H). <sup>13</sup>C NMR (125 MHz, CDCl<sub>3</sub>)  $\delta$  ppm; 138.9, 135.0, 129.3, 128.9, 128.5, 124.8, 119.7 (q,  $J_{CF} = 320.7$  Hz), 48.1, 21.2. <sup>19</sup>F NMR (470 MHz, CDCl<sub>3</sub>)  $\delta$  ppm; -78.3 (s, 3F). The <sup>1</sup>H and <sup>13</sup>C NMR spectra of the product were identical to those reported in the literature.<sup>2b</sup>

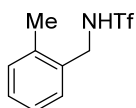

**1,1,1-Trifluoro-N-(2-methylbenzyl)methanesulfonamide (4e):** 76% (76.7 mg).  $R_f = 0.63$  (hexane:AcOEt = 3:1). Yellow oil. <sup>1</sup>H NMR (500 MHz, CDCl<sub>3</sub>)  $\delta$  ppm; 7.31-7.27 (m, 2H), 7.25-7.20 (m, 2H), 4.90 (brs, 1H), 4.45 (d,  $J = 4.0$  Hz, 2H), 2.38 (s, 3H). <sup>13</sup>C NMR (125 MHz, CDCl<sub>3</sub>)  $\delta$  ppm; 136.5, 132.8, 130.9, 128.9, 128.8, 126.6, 119.7 (q,  $J_{CF} = 321.1$  Hz), 46.2, 18.7. <sup>19</sup>F NMR (470 MHz, CDCl<sub>3</sub>)  $\delta$  ppm; -78.2 (s, 3F). The <sup>1</sup>H and <sup>13</sup>C NMR spectra of the product were identical to those reported in the literature.<sup>2b</sup>

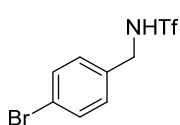

**N-(4-Bromobenzyl)-1,1,1-trifluoromethanesulfonamide (4f):** 85% (108.0 mg).  $R_f = 0.56$  (hexane:AcOEt = 3:1). White solid. Mp 61-63 °C. IR (KBr)  $\nu$  cm<sup>-1</sup>; 3301, 1451, 1365, 1230, 1197, 1143, 1057, 865, 795, 610. <sup>1</sup>H NMR (500 MHz, CDCl<sub>3</sub>)  $\delta$  ppm; 7.53 (d,  $J = 8.0$  Hz, 2H), 7.22 (d,  $J = 8.0$  Hz, 2H), 4.99 (brs, 1H), 4.42 (d,  $J = 5.2$  Hz, 2H). <sup>13</sup>C NMR (125 MHz, CDCl<sub>3</sub>)  $\delta$  ppm; 134.2, 132.2, 129.5, 122.7, 119.6 (q,  $J_{CF} = 320.7$  Hz), 47.5. <sup>19</sup>F NMR (470 MHz, CDCl<sub>3</sub>)  $\delta$  ppm; -78.3 (s, 3F). HRMS (FAB, m/z): calcd. for C<sub>8</sub>H<sub>8</sub>BrF<sub>3</sub>NO<sub>2</sub>S, [M+H] 317.9411; found, 317.9407.

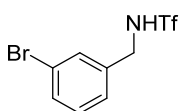

**N-(3-Bromobenzyl)-1,1,1-trifluoromethanesulfonamide (4g):** 70% (89.5 mg).  $R_f = 0.56$  (hexane:AcOEt = 3:1). Yellow oil. <sup>1</sup>H NMR (500 MHz, CDCl<sub>3</sub>)  $\delta$  ppm; 7.52-7.47 (m, 2H), 7.29-7.26 (m, 2H), 5.09 (brs, 1H), 4.43 (d,  $J = 5.7$  Hz, 2H). <sup>13</sup>C NMR (125 MHz, CDCl<sub>3</sub>)  $\delta$  ppm; 137.4, 131.7, 130.8, 130.6, 126.3, 122.9, 119.6 (q,  $J_{CF} = 321.1$  Hz), 47.4. <sup>19</sup>F NMR (470 MHz, CDCl<sub>3</sub>)  $\delta$  ppm; -78.3 (s, 3F). The <sup>1</sup>H and <sup>13</sup>C NMR spectra of the product were identical to those reported in the literature.<sup>2b</sup>

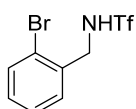

**N-(2-Bromobenzyl)-1,1,1-trifluoromethanesulfonamide (4h):** 75% (95.5 mg).  $R_f = 0.70$  (hexane:AcOEt = 3:1). Yellow oil. <sup>1</sup>H NMR (500 MHz, CDCl<sub>3</sub>)  $\delta$  ppm; 7.60 (d,  $J = 7.5$  Hz, 1H), 7.42 (d,  $J = 7.5$  Hz, 1H), 7.36 (dd,  $J = 7.5, 7.5$  Hz, 1H), 7.25 (dd,  $J = 7.5, 7.5$  Hz, 1H), 5.36 (brs, 1H), 4.54 (d,  $J = 6.3$  Hz, 2H). <sup>13</sup>C NMR (125 MHz, CDCl<sub>3</sub>)  $\delta$  ppm; 134.7, 133.1, 130.5, 130.4, 128.1, 123.6, 119.5 (q,  $J_{CF} = 320.7$  Hz), 48.3. <sup>19</sup>F NMR (470 MHz, CDCl<sub>3</sub>)  $\delta$  ppm; -78.5 (s, 3F). The <sup>1</sup>H and <sup>13</sup>C NMR spectra of the product were identical to those reported in the literature.<sup>2b</sup>

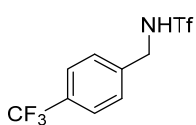

**1,1,1-Trifluoro-N-[4-(trifluoromethyl)benzyl]methanesulfonamide (4i):** 67% (82.8 mg).  $R_f = 0.58$  (hexane:AcOEt = 3:1). White solid. <sup>1</sup>H NMR (500 MHz, CDCl<sub>3</sub>)  $\delta$  ppm; 7.67 (d,  $J = 8.0$  Hz, 2H), 7.47 (d,  $J = 8.0$  Hz, 2H), 5.25 (brs, 1H), 4.53 (d,  $J = 5.7$  Hz, 2H). <sup>13</sup>C NMR (125 MHz, CDCl<sub>3</sub>)  $\delta$  ppm; 139.2, 130.9 (q,  $J_{CF} = 32.8$  Hz), 128.0, 126.0 (q,  $J_{CF} = 3.6$  Hz), 123.8 (q,  $J_{CF} = 272.3$  Hz), 119.6 (q,  $J_{CF} = 321.1$  Hz), 47.5. <sup>19</sup>F NMR (470 MHz, CDCl<sub>3</sub>)  $\delta$  ppm; -63.9 (s, 3F), -78.3 (s, 3F). The <sup>1</sup>H and <sup>13</sup>C NMR spectra of the product were identical to those reported in the literature.<sup>2b</sup>

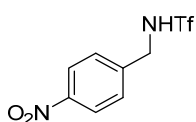

**1,1,1-Trifluoro-N-(4-nitrobenzyl)methanesulfonamide (4j):** 39% (44.1 mg).  $R_f = 0.33$  (hexane:AcOEt = 3:1). Brown solid. Mp 39-41 °C. IR (KBr)  $\nu$  cm<sup>-1</sup>; 3297, 1608, 1528, 1441, 1372, 1354, 1231, 1194, 1149, 1065, 863, 744, 608. <sup>1</sup>H NMR (500 MHz, CDCl<sub>3</sub>)  $\delta$  ppm; 8.26 (d,  $J = 8.6$  Hz, 2H), 7.53 (d,  $J = 8.6$  Hz, 2H), 5.44 (brs, 1H), 4.58 (d,  $J = 5.7$  Hz, 2H). <sup>13</sup>C NMR (125 MHz, CDCl<sub>3</sub>)  $\delta$  ppm; 147.7, 142.8, 128.4, 124.1, 119.5 (q,  $J_{CF} = 320.7$  Hz), 47.1. <sup>19</sup>F NMR (470 MHz, CDCl<sub>3</sub>)  $\delta$  ppm; -78.2 (s, 3F). HRMS (FAB, m/z): calcd. for C<sub>8</sub>H<sub>8</sub>F<sub>3</sub>N<sub>2</sub>O<sub>4</sub>S [M+H] 285.0157; found, 285.0150.

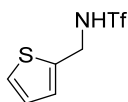

**1,1,1-Trifluoro-N-(thiophen-2-ylmethyl)methanesulfonamide (4k):** 56% (55.3 mg).  $R_f = 0.58$  (hexane:AcOEt = 3:1). White solid. <sup>1</sup>H NMR (500 MHz, CDCl<sub>3</sub>)  $\delta$  ppm; 7.33 (dd,  $J = 5.2, 1.2$  Hz, 1H), 7.06 (dd,  $J = 3.4, 1.2$  Hz, 1H), 7.00 (dd,  $J = 5.2, 3.4$  Hz, 1H), 5.04 (brs, 1H), 4.65 (d,  $J = 5.7$  Hz, 2H). <sup>13</sup>C NMR (125 MHz, CDCl<sub>3</sub>)  $\delta$  ppm; 137.4, 127.5, 127.3, 126.8, 119.5 (q,  $J_{CF} = 320.7$  Hz), 42.9. <sup>19</sup>F NMR (470 MHz, CDCl<sub>3</sub>)  $\delta$  ppm; -78.5 (s, 3F). The <sup>1</sup>H, <sup>19</sup>F and <sup>13</sup>C NMR spectra of the product were identical to those reported in the literature.<sup>2c</sup>

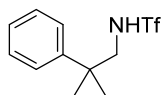

**1,1,1-Trifluoro-*N*-(2-methyl-2-phenylpropyl)methanesulfonamide (4l):** 57% (64.1 mg).  $R_f = 0.66$  (hexane:AcOEt = 3:1). White solid. Mp 64–66 °C. IR (KBr)  $\nu$   $\text{cm}^{-1}$ ; 3280, 2978, 1434, 1377, 1232, 1178, 1154, 1071, 875, 765, 607.  $^1\text{H}$  NMR (500 MHz,  $\text{CDCl}_3$ )  $\delta$  ppm; 7.41–7.26 (m, 5H), 4.34 (brs, 1H), 3.41 (d,  $J = 5.7$  Hz, 2H), 1.41 (s, 6H).  $^{13}\text{C}$  NMR (125 MHz,  $\text{CDCl}_3$ )  $\delta$  ppm; 144.3, 129.0, 127.1, 125.8, 119.6 (q,  $J_{\text{CF}} = 321.5$  Hz), 55.7, 38.4, 26.1.  $^{19}\text{F}$  NMR (470 MHz,  $\text{CDCl}_3$ )  $\delta$  ppm; -78.2 (s, 3F). HRMS (FAB,  $m/z$ ): calcd. for  $\text{C}_{11}\text{H}_{15}\text{F}_3\text{NO}_2\text{S}$   $[\text{M}+\text{H}]^+$  282.0776; found, 282.0765.

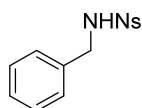

***N*-Benzyl-4-nitrobenzenesulfonamide (6):** 71% (83.2 mg).  $R_f = 0.32$  (hexane:AcOEt = 3:1). Pale yellow solid.  $^1\text{H}$  NMR (500 MHz,  $\text{CDCl}_3$ )  $\delta$  ppm; 8.31 (d,  $J = 8.6$  Hz, 2H), 7.99 (d,  $J = 8.6$  Hz, 2H), 7.30–7.25 (m, 3H), 7.20–7.14 (m, 2H), 4.89 (brs, 1H), 4.24 (d,  $J = 6.3$  Hz, 2H).  $^{13}\text{C}$  NMR (125 MHz,  $\text{CDCl}_3$ )  $\delta$  ppm; 150.0, 146.0, 135.4, 128.8, 128.3, 127.9, 124.3, 48.4 (Note that the two carbon peaks overlap each other). The  $^1\text{H}$  and  $^{13}\text{C}$  NMR spectra of the product were identical to those reported in the literature.<sup>3</sup>

#### 4. Other Conversion Reactions of *N*-Tryflylimine 3a

##### a) Preparation of 1,1,1-trifluoro-*N*-(1-phenylethyl)methanesulfonamide (7)

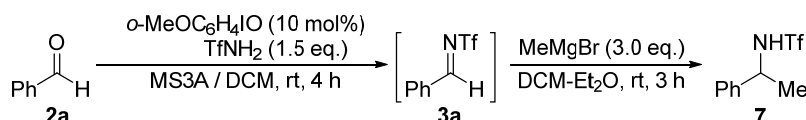

To a suspension of 1-iodosyl-2-methoxybenzene (10.0 mg 0.04 mmol) and MS3A (360 mg) in dichloromethane (DCM, 1.0 mL) was added  $\text{TfNH}_2$  (89.5 mg, 0.6 mmol) and benzaldehyde (**2a**, 40.8  $\mu\text{L}$ , 0.4 mmol) at room temperature. After the reaction mixture was stirred at same temperature for 4 h,  $\text{Et}_2\text{O}$  (3.0 mL) and  $\text{MeMgBr}$  (3.0 M in  $\text{Et}_2\text{O}$  solution, 0.4 mL, 1.2 mmol) were added at 0 °C. The reaction mixture was stirred at room temperature for 3 h and then was filtered through celite pad. The filtrate was quenched with sat.  $\text{NH}_4\text{Cl}$  and extracted with AcOEt. The organic layer was dried over  $\text{MgSO}_4$  and concentrated in vacuo to dryness. The residue was purified by MPLC (hexane:AcOEt = 9:1) to give **7** (86.1 mg, 85%) as a colorless oil.

$^1\text{H}$  NMR (500 MHz,  $\text{CDCl}_3$ )  $\delta$  ppm; 7.43–7.36 (m, 2H), 7.36–7.30 (m, 3H), 5.17 (brs, 1H), 4.80 (dq,  $J = 6.8, 6.8$  Hz, 1H), 1.65 (d,  $J = 6.8$  Hz, 3H).  $^{13}\text{C}$  NMR (125 MHz,  $\text{CDCl}_3$ )  $\delta$  ppm; 140.9, 129.0, 128.3, 125.9, 119.5 (q,  $J_{\text{CF}} = 320.9$  Hz), 55.3, 23.4.  $^{19}\text{F}$  NMR (470 MHz,  $\text{CDCl}_3$ )  $\delta$  ppm; -78.8 (s, 3F). The  $^1\text{H}$  and  $^{13}\text{C}$  NMR spectra of the product were identical to those reported in the literature.<sup>4</sup>

##### b) Preparation of 1,1,1-trifluoro-*N*-(3-oxo-1,3-diphenylpropyl)methanesulfonamide (8)

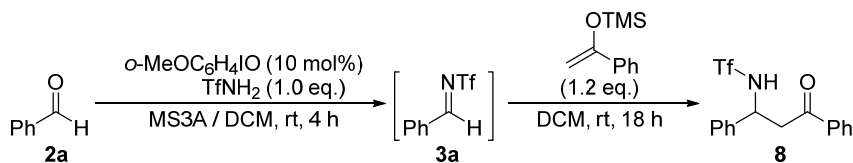

To a suspension of 1-iodosyl-2-methoxybenzene (10.0 mg 0.04 mmol) and MS3A (360 mg) in dichloromethane (DCM, 1.0 mL) was added  $\text{TfNH}_2$  (59.6 mg, 0.4 mmol) and benzaldehyde (**2a**, 40.8  $\mu\text{L}$ , 0.4 mmol) at room temperature. After the reaction mixture was stirred at same temperature for 4 h, 1-phenyl-1-trimethylsilyloxyethylene (98.4  $\mu\text{L}$ , 0.48 mmol) were added at room temperature. The reaction mixture was stirred at room temperature for 18 h and then was filtered through celite pad. The filtrate was concentrated in vacuo to dryness. The residue was purified by PTLC ( $R_f = 0.44$ , hexane:AcOEt = 3:1) to give **8** (86.1 mg, 85%) as a white solid.

Mp 111–113 °C. IR (KBr)  $\nu$   $\text{cm}^{-1}$ ; 3247, 1675, 1377, 1234, 1189, 1150, 1053, 597.  $^1\text{H}$  NMR (500 MHz,  $\text{CDCl}_3$ )  $\delta$  ppm; 7.91–7.83 (m, 2H), 7.60 (t,  $J = 7.7$  Hz, 1H), 7.46 (dd,  $J = 7.7$  Hz, 2H), 7.39–7.32 (m, 4H), 7.30–7.26 (m, 1H), 6.84 (d,  $J = 9.2$  Hz, 1H), 5.18 (ddd,  $J = 9.2, 5.7, 4.0$  Hz, 1H), 3.84 (dd,  $J = 17.8, 4.0$  Hz, 1H), 3.58 (dd,  $J = 17.8, 5.7$  Hz, 1H).  $^{13}\text{C}$  NMR (125 MHz,  $\text{CDCl}_3$ )  $\delta$  ppm; 198.1, 139.1, 136.0, 134.1, 128.84, 128.80, 128.11, 128.08, 126.1, 119.4 (q,  $J_{\text{CF}} = 321.1$  Hz), 55.6, 43.8.  $^{19}\text{F}$  NMR (470 MHz,  $\text{CDCl}_3$ )  $\delta$  ppm; -78.8 (s, 3F). HRMS (ESI,  $m/z$ ): calcd. for  $\text{C}_{16}\text{H}_{14}\text{F}_3\text{NKO}_3\text{S}^+$   $[\text{M}+\text{K}]^+$  396.0278; found, 396.0289.

<sup>3</sup> I. Nageli, C. Baud, G. Bernardinelli, Y. Jacqnier, M. Moran and P. Müller, *Helv. Chim. Acta*, 1997, **80**, 1087.

<sup>4</sup> K. W. Fiori and J. Du Bois, *J. Am. Chem. Soc.*, 2007, **129**, 562.

c) Preparation of *N*-[cyano(phenyl)methyl]-1,1,1-trifluoromethanesulfonamide (**9**)

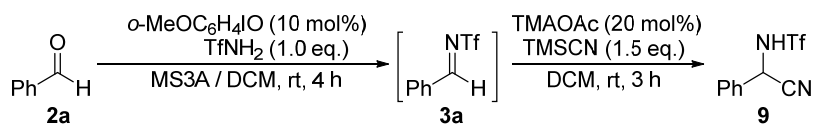

To a suspension of 1-iodosyl-2-methoxybenzene (10.0 mg 0.04 mmol) and MS3A (360 mg) in dichloromethane (DCM, 1.0 mL) was added TfNH<sub>2</sub> (59.6 mg, 0.4 mmol) and benzaldehyde (**2a**, 40.8  $\mu$ L, 0.4 mmol) at room temperature. After the reaction mixture was stirred at same temperature for 4 h, trimethylsilyl cyanide (TMSCN, 74.8  $\mu$ L, 0.6 mmol) and tetramethylammonium acetate (10.7 mg, 0.08 mmol) were added at room temperature. The reaction mixture was stirred at room temperature for 3 h and then was filtered through celite pad. The filtrate was concentrated in vacuo to dryness. The residue was purified by MPLC (hexane:AcOEt = 3:1) to give **9** (81.4 mg, 77%) as a white solid.

Mp 105-106 °C. IR (KBr)  $\nu$  cm<sup>-1</sup>; 3119, 2269, 1462, 1378, 1232, 1194, 1145, 1065, 613. <sup>1</sup>H NMR (500 MHz, CDCl<sub>3</sub>)  $\delta$  ppm; 7.69-7.46 (m, 5H), 5.62 (s, 1H). <sup>13</sup>C NMR (125 MHz, CDCl<sub>3</sub>)  $\delta$  ppm; 131.1, 130.6, 129.8, 127.0, 119.2 (q,  $J_{CF}$  = 320.3 Hz), 115.7, 49.1. <sup>19</sup>F NMR (470 MHz, CDCl<sub>3</sub>)  $\delta$  ppm; -78.4 (s, 3F). HRMS (ESI, m/z): calcd. for C<sub>8</sub>H<sub>7</sub>F<sub>3</sub>NO<sub>2</sub>S<sup>+</sup> [M-CN]<sup>+</sup> 238.0144; found, 238.0148.

## 5. $^1\text{H}$ and $^{13}\text{C}$ NMR Spectra of 4a-4h and 6-9

$^1\text{H}$  NMR (500 MHz,  $\text{CDCl}_3$ ) of 4a

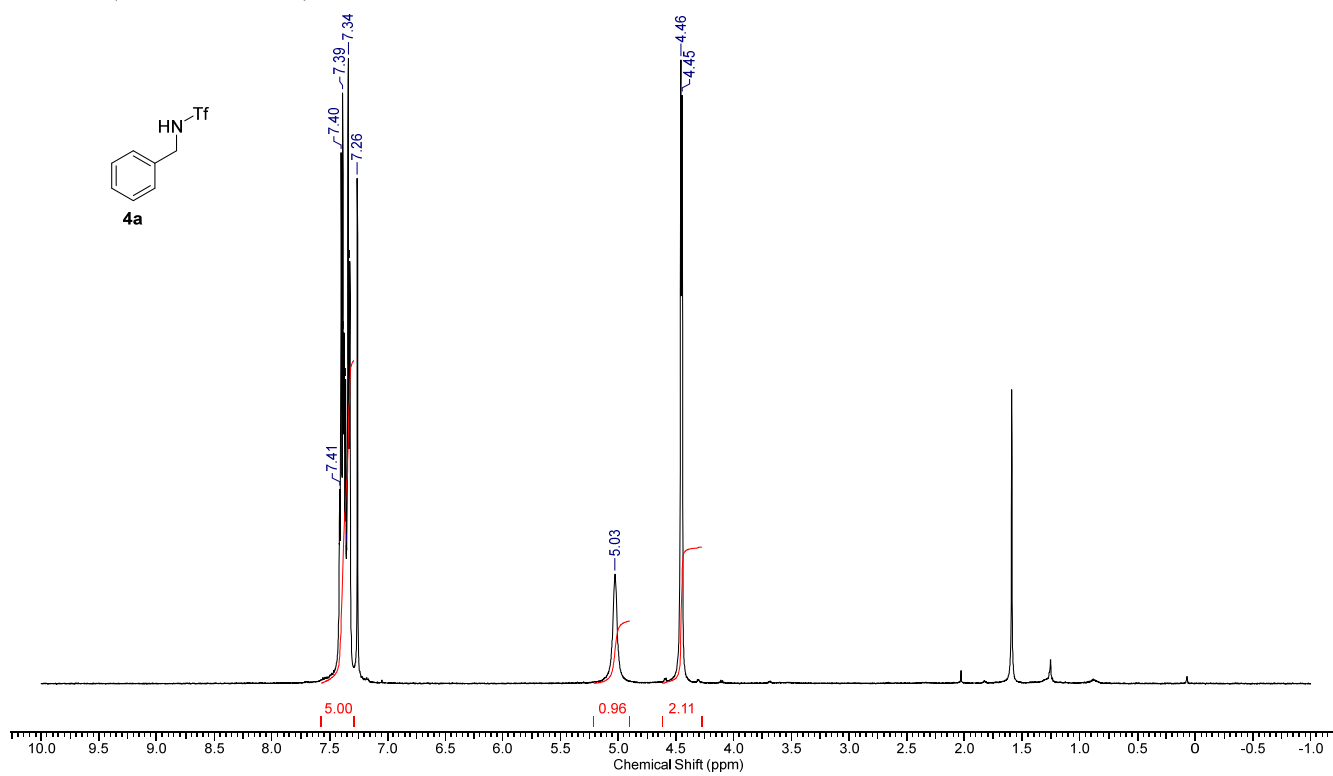

$^{13}\text{C}$  NMR (125 MHz,  $\text{CDCl}_3$ ) of 4a

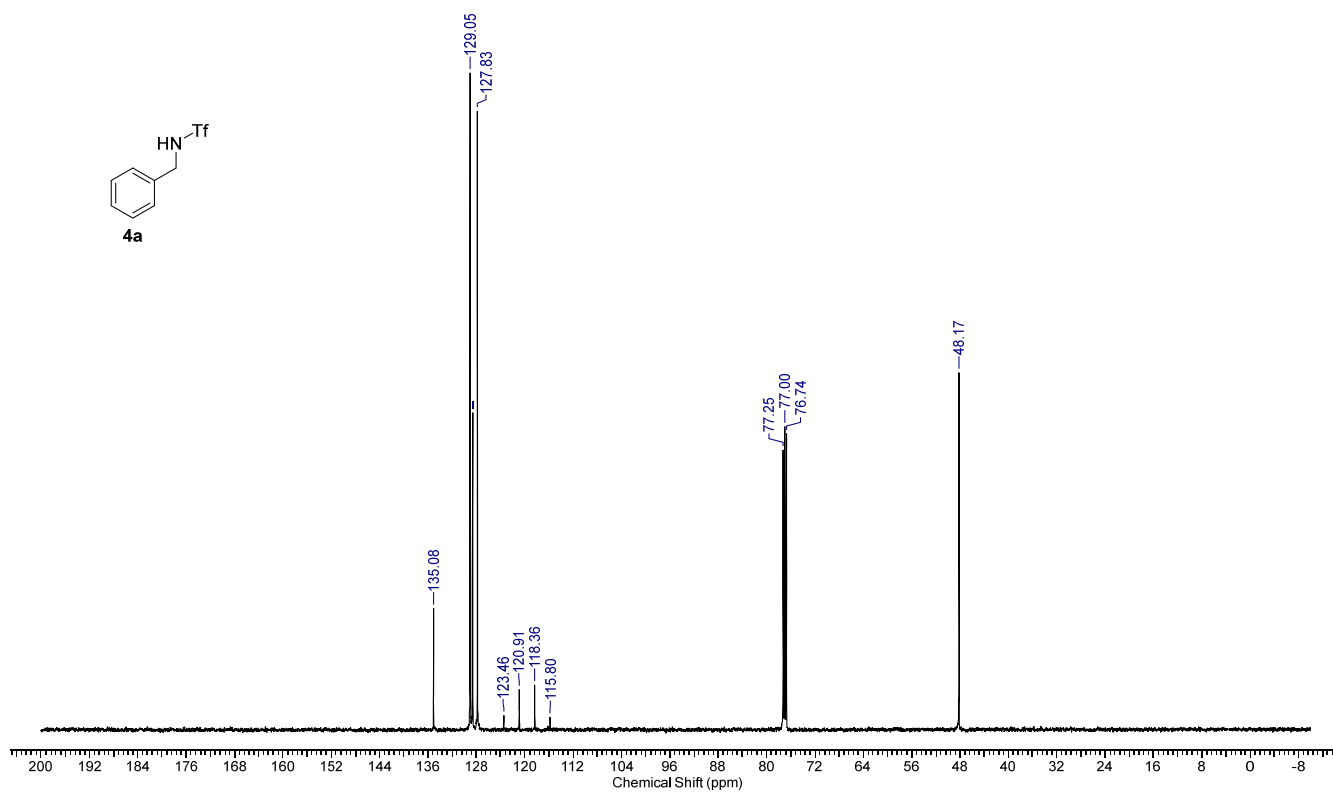

$^1\text{H}$  NMR (500 MHz,  $\text{CDCl}_3$ ) of **4b**

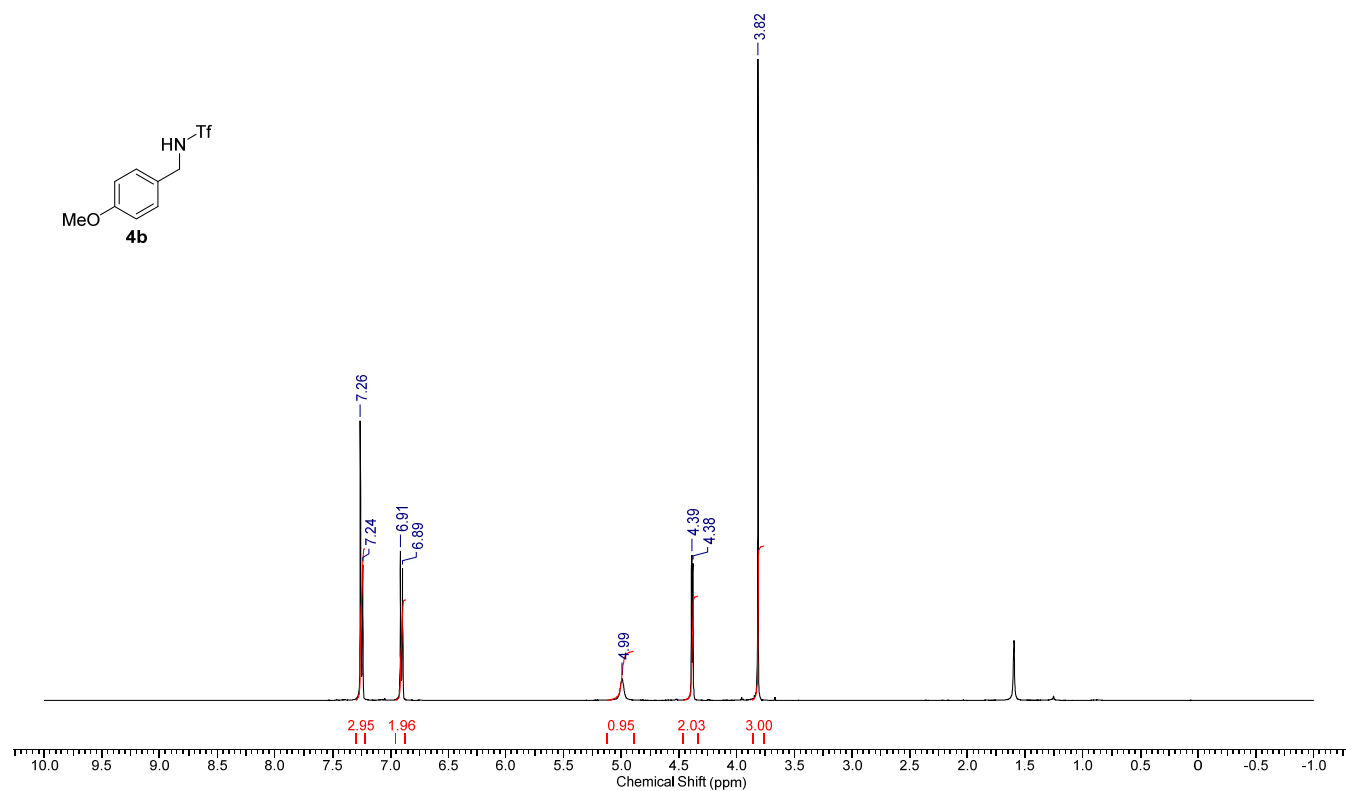

$^{13}\text{C}$  NMR (125 MHz,  $\text{CDCl}_3$ ) of **4b**

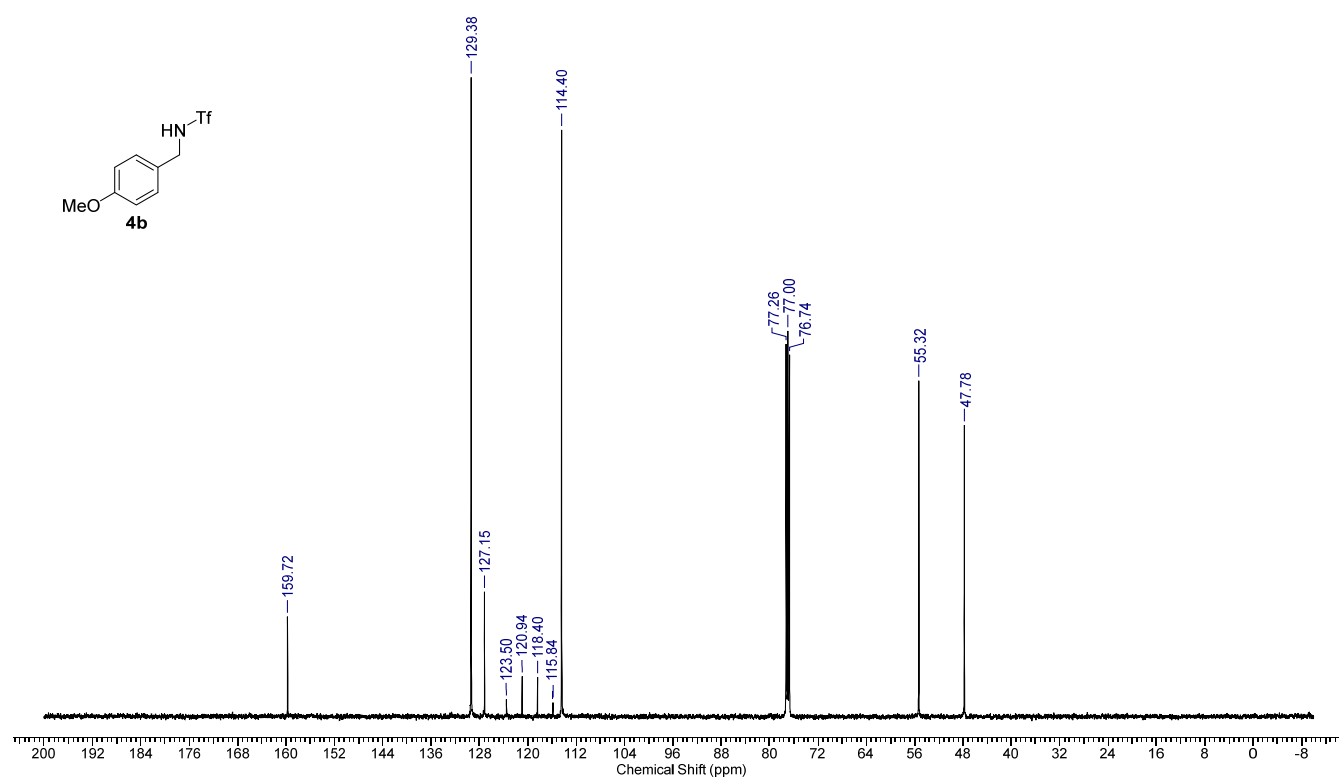



<sup>1</sup>H NMR (500 MHz, CDCl<sub>3</sub>) of **4c**

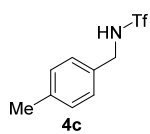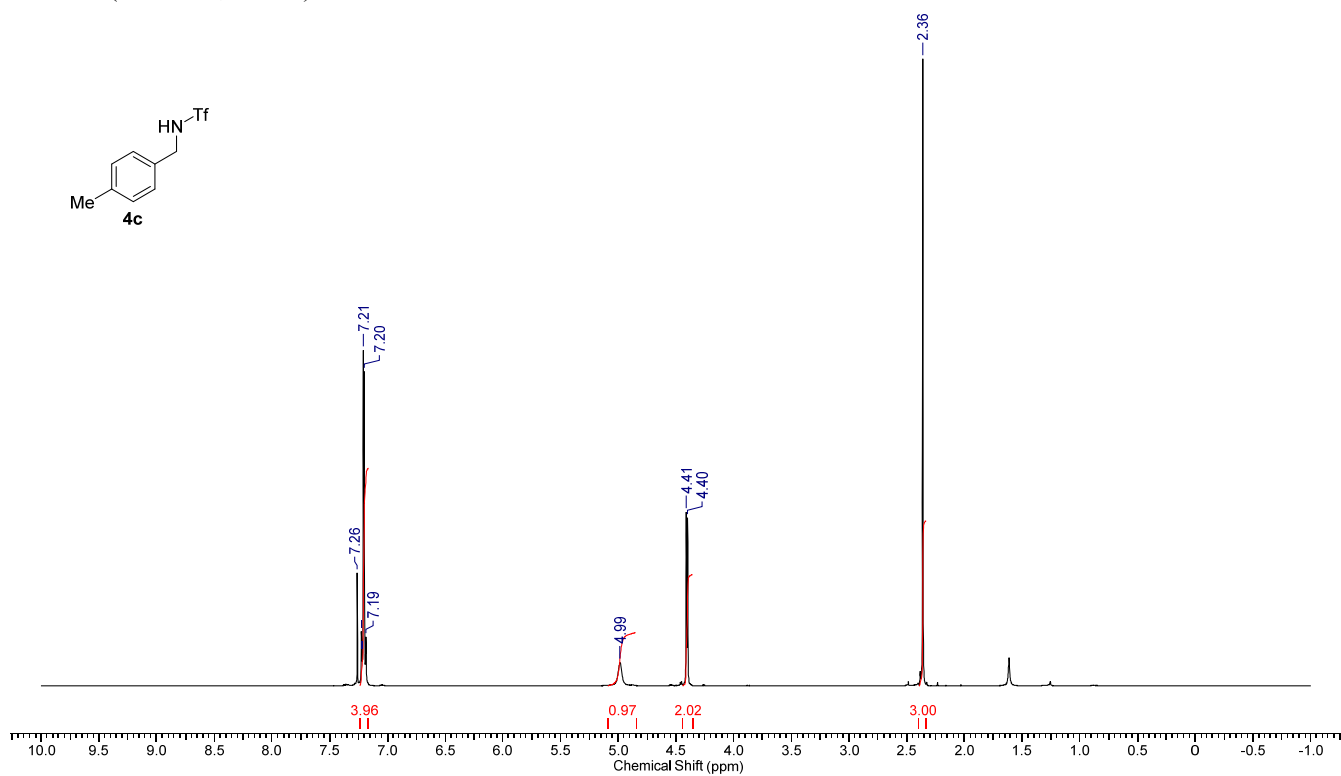

<sup>13</sup>C NMR (125 MHz, CDCl<sub>3</sub>) of **4c**

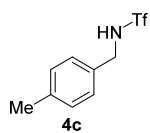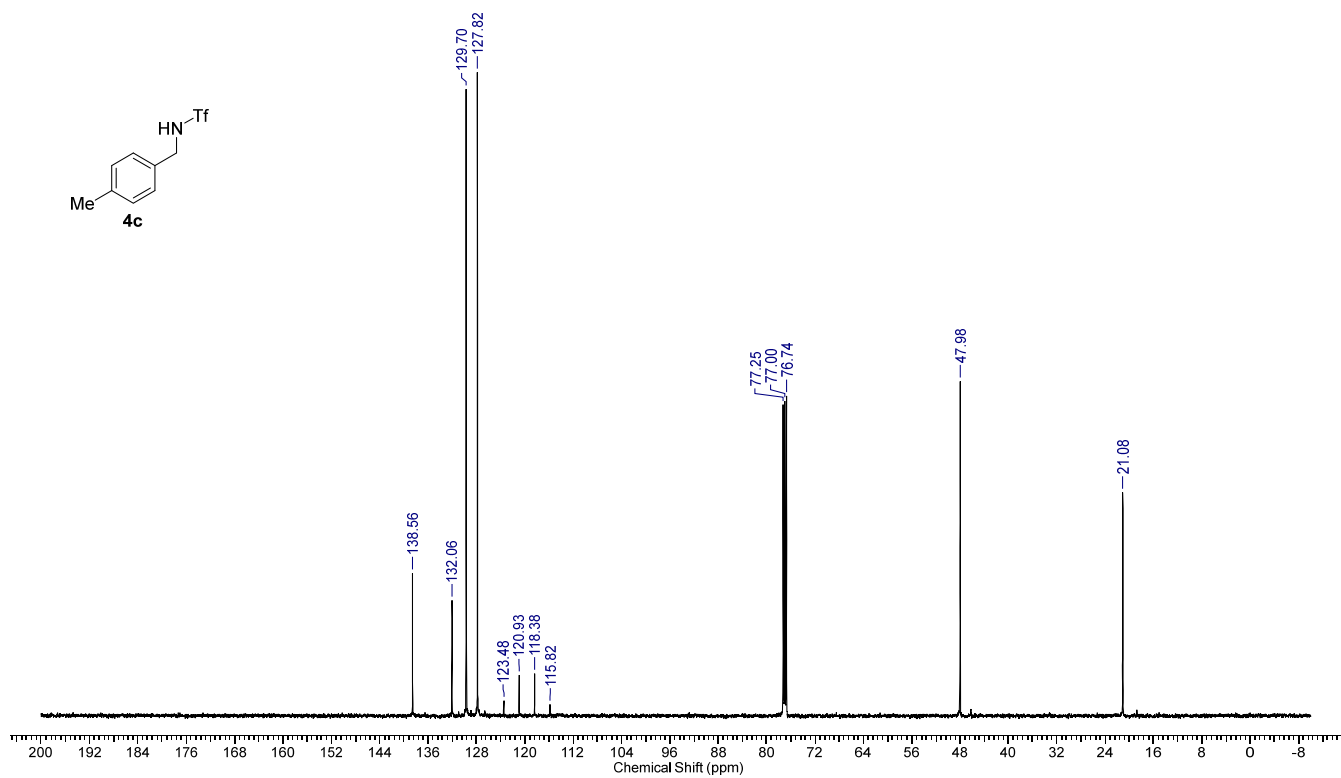

<sup>1</sup>H NMR (500 MHz, CDCl<sub>3</sub>) of **4d**

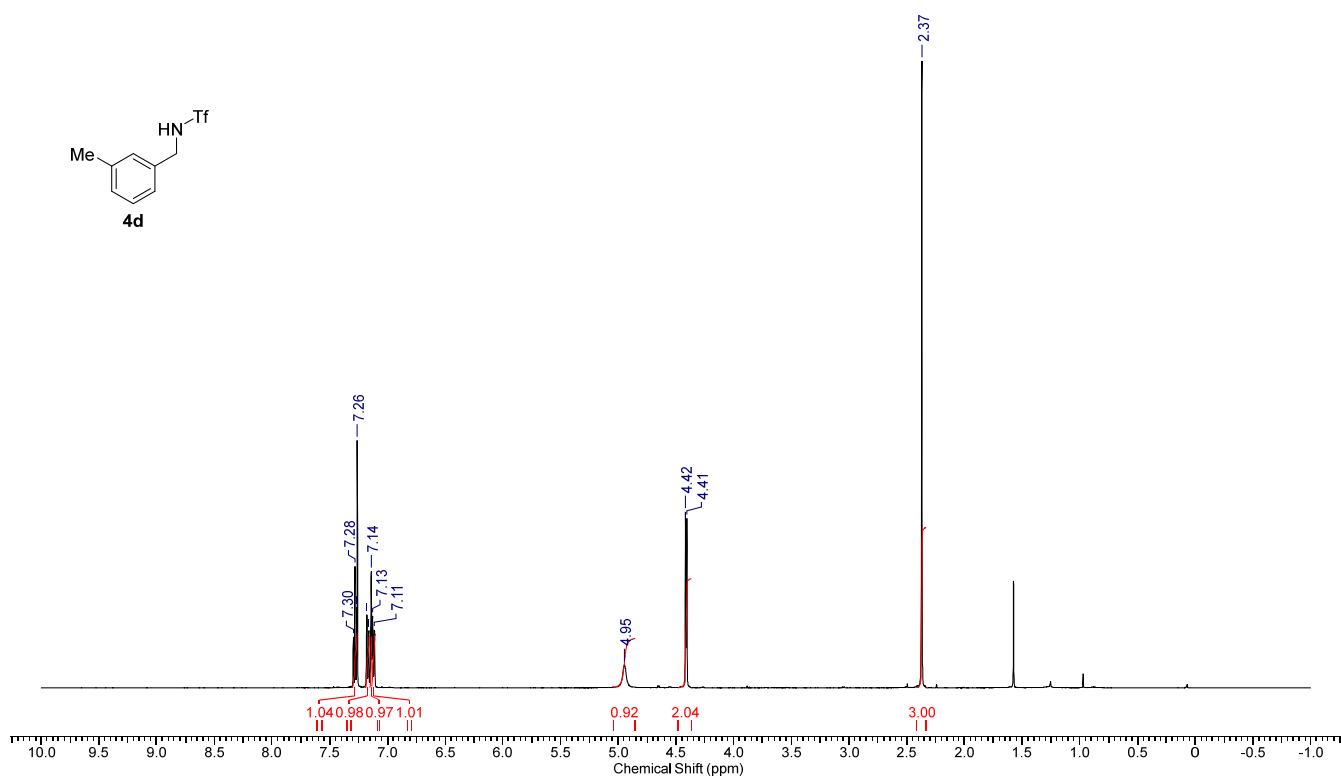

<sup>13</sup>C NMR (125 MHz, CDCl<sub>3</sub>) of **4d**

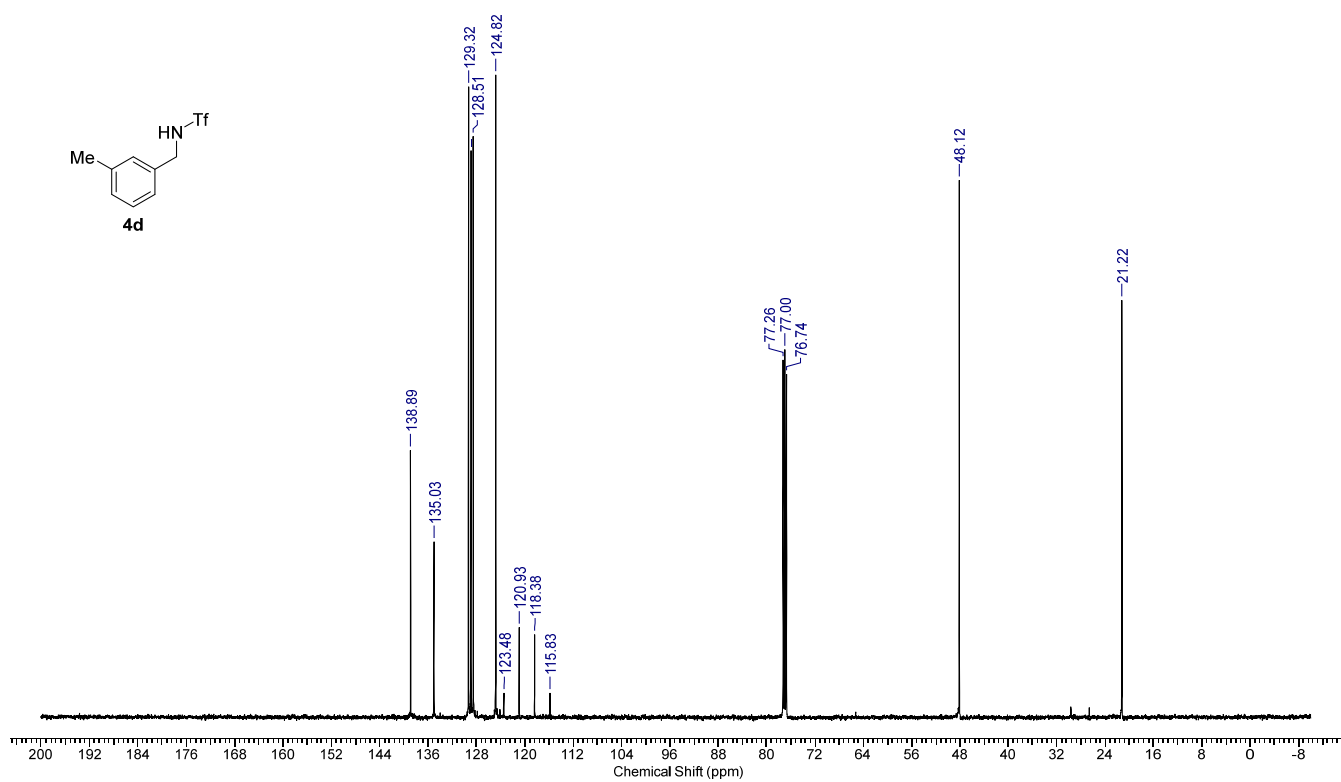

<sup>1</sup>H NMR (500 MHz, CDCl<sub>3</sub>) of **4e**

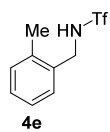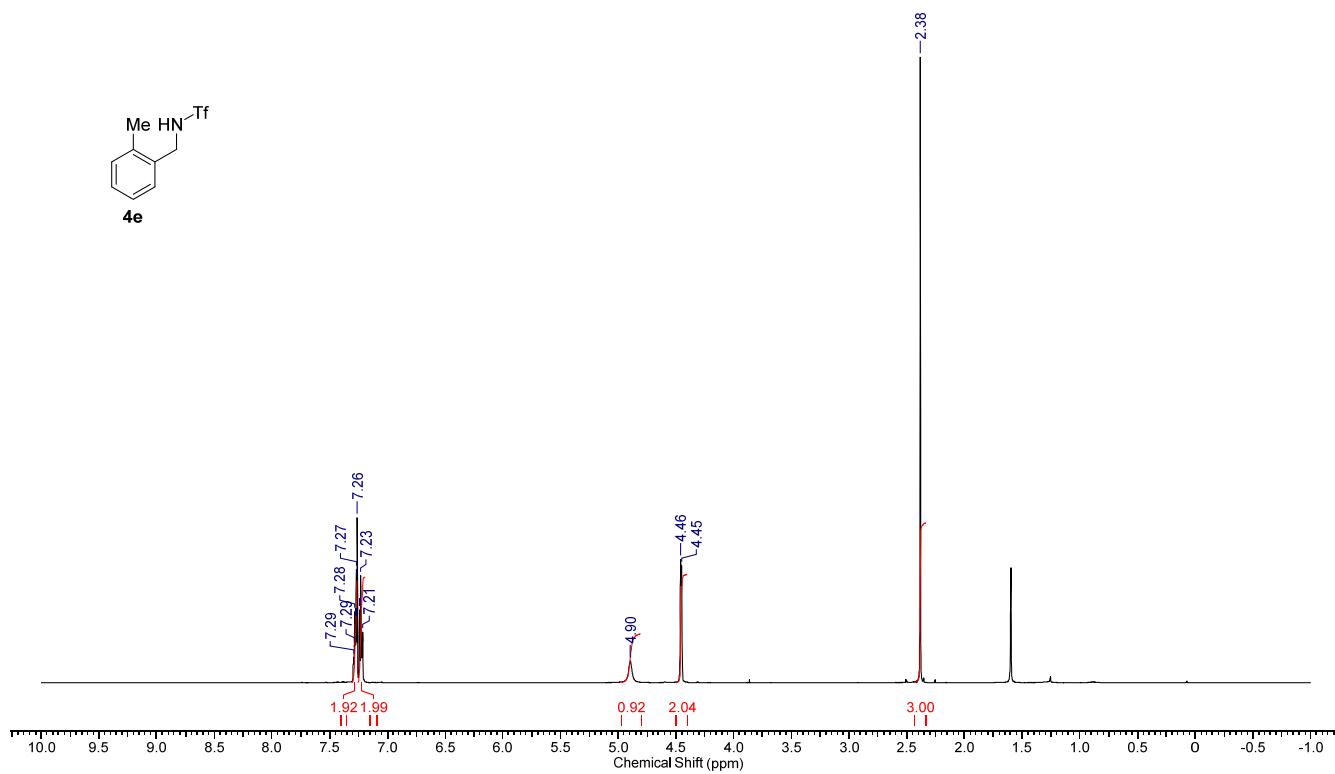

<sup>13</sup>C NMR (125 MHz, CDCl<sub>3</sub>) of **4e**

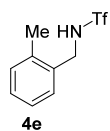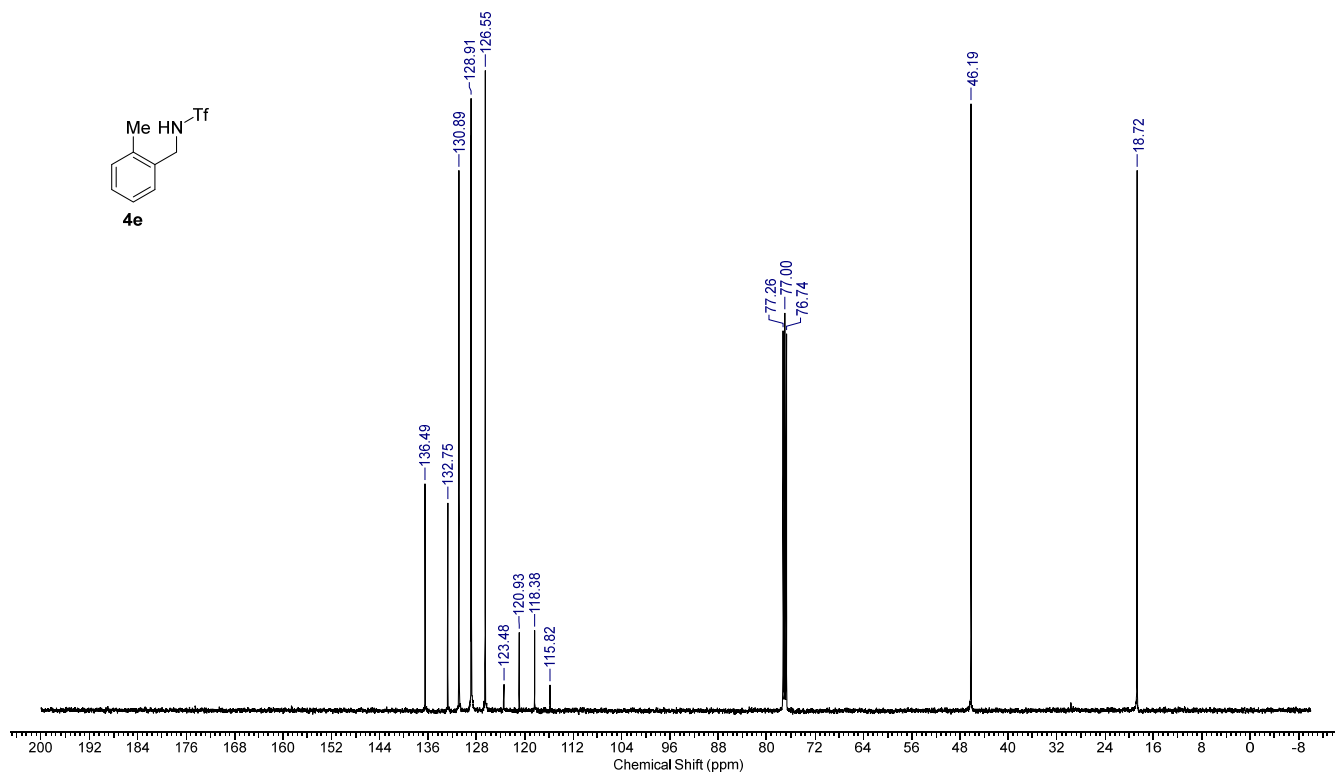

<sup>1</sup>H NMR (500 MHz, CDCl<sub>3</sub>) of **4f**

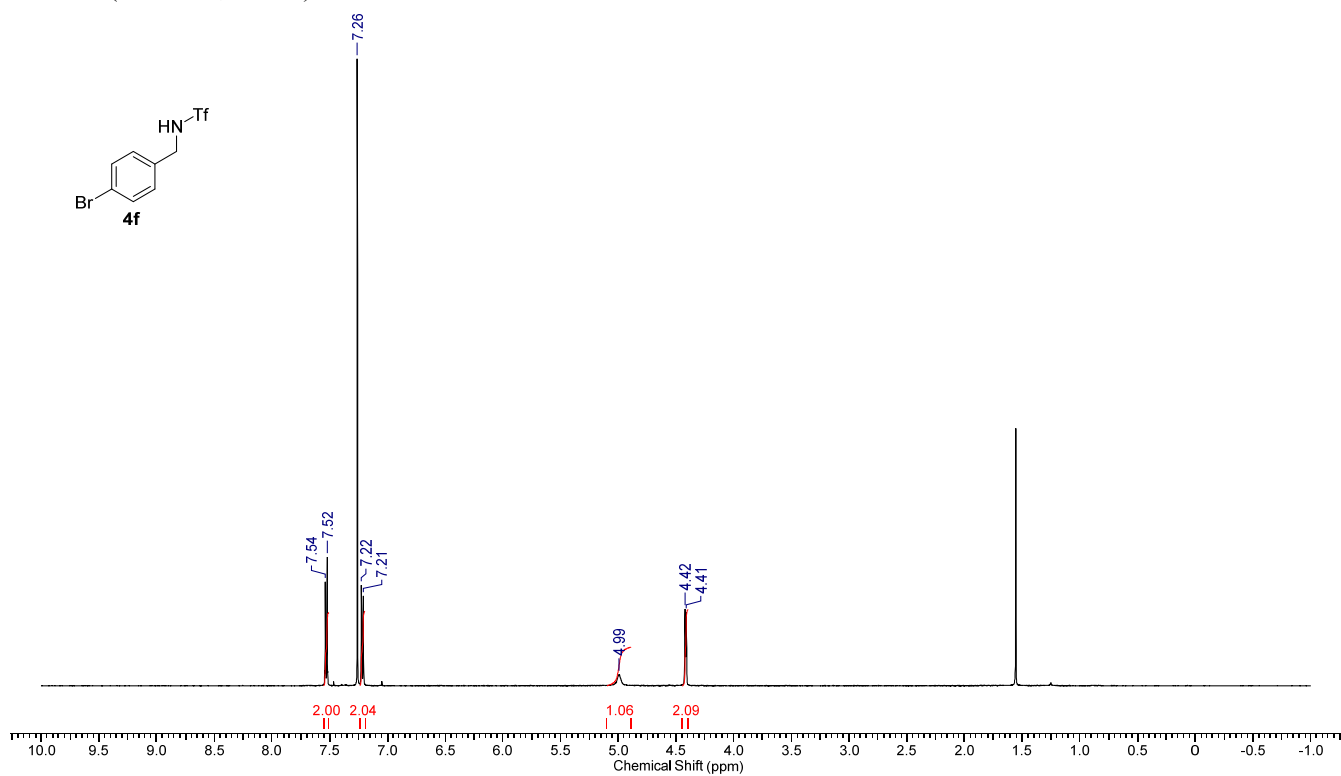

<sup>13</sup>C NMR (125 MHz, CDCl<sub>3</sub>) of **4f**

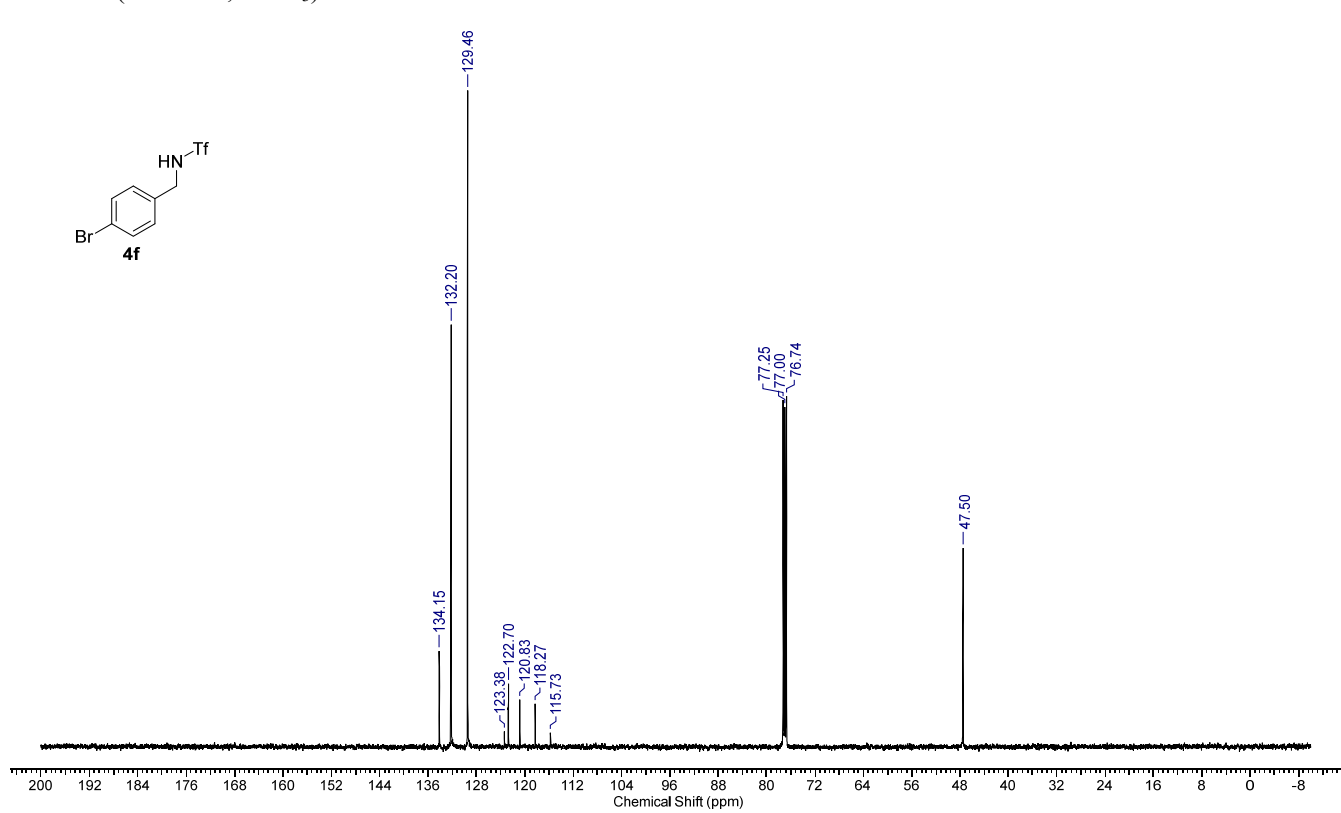

$^1\text{H}$  NMR (500 MHz,  $\text{CDCl}_3$ ) of **4g**

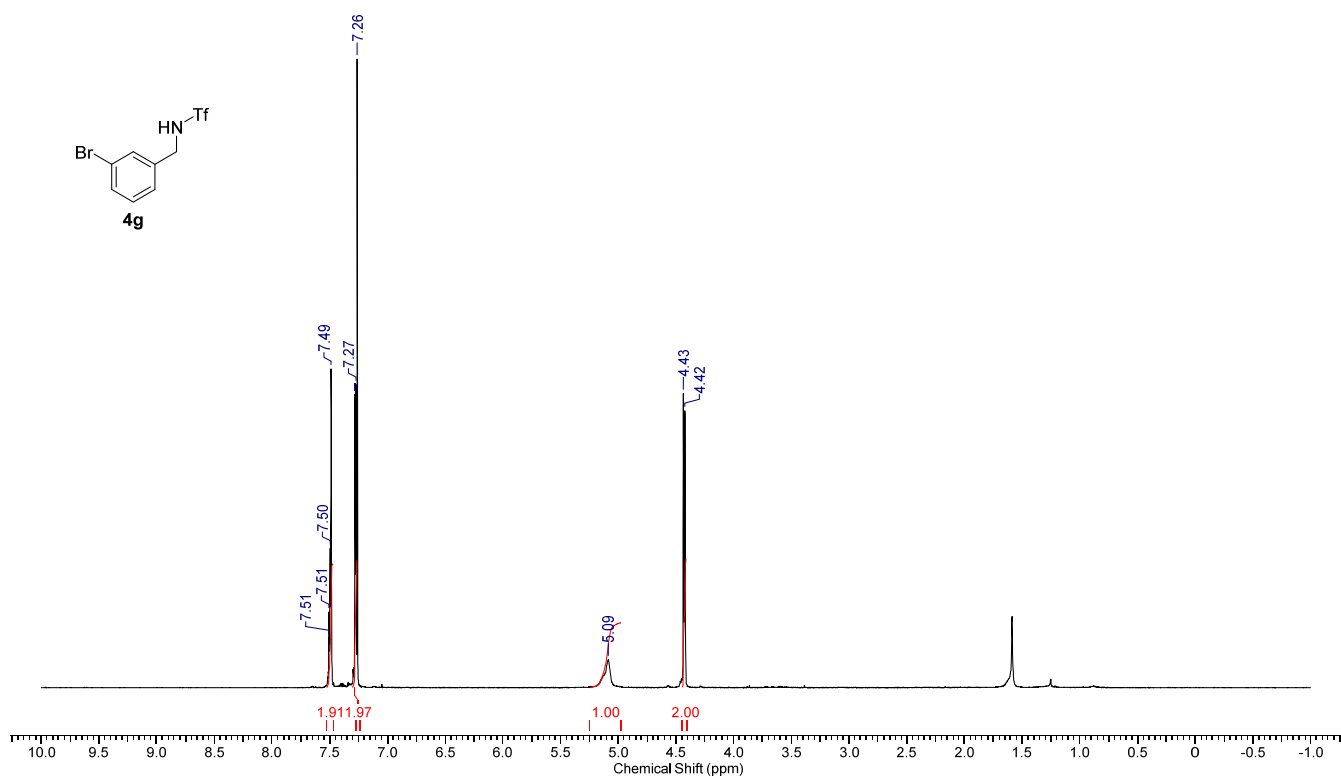

$^{13}\text{C}$  NMR (125 MHz,  $\text{CDCl}_3$ ) of **4g**

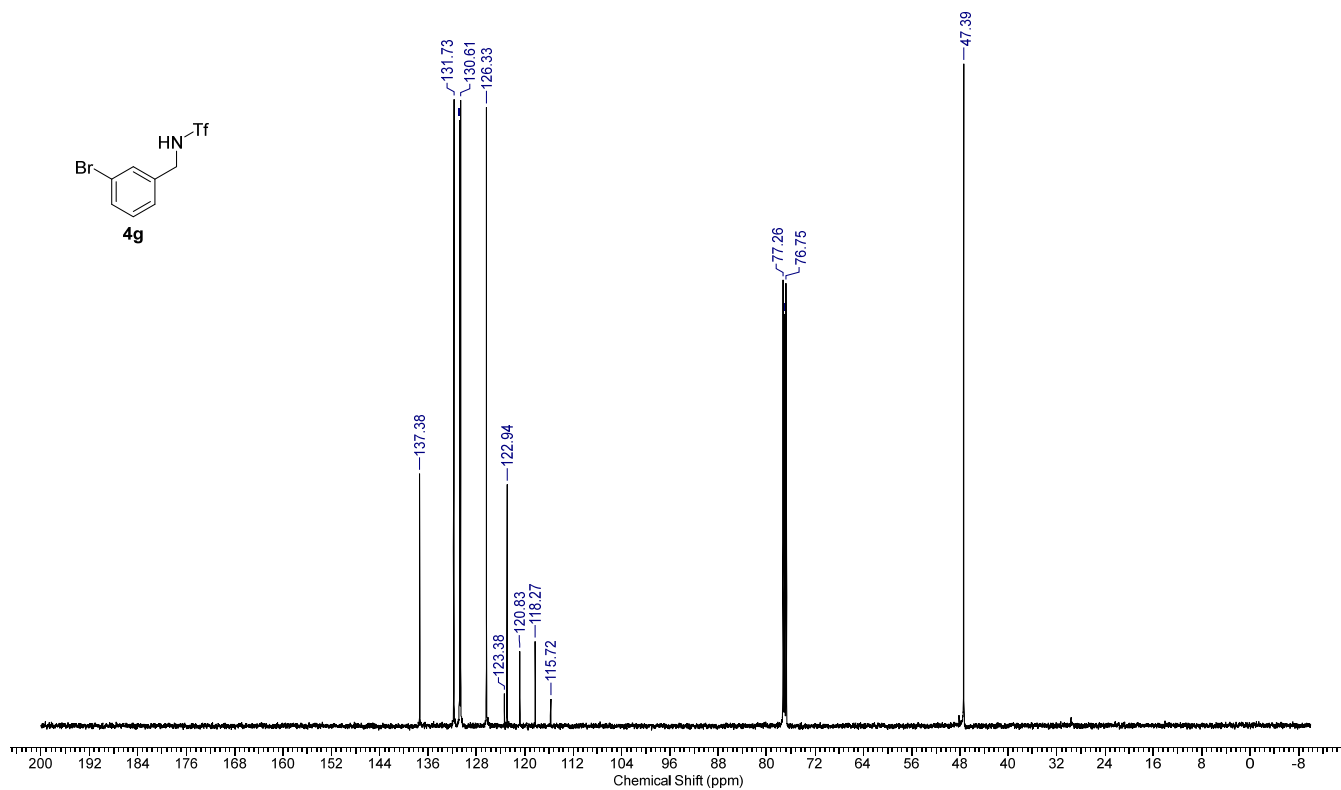

<sup>1</sup>H NMR (500 MHz, CDCl<sub>3</sub>) of **4h**

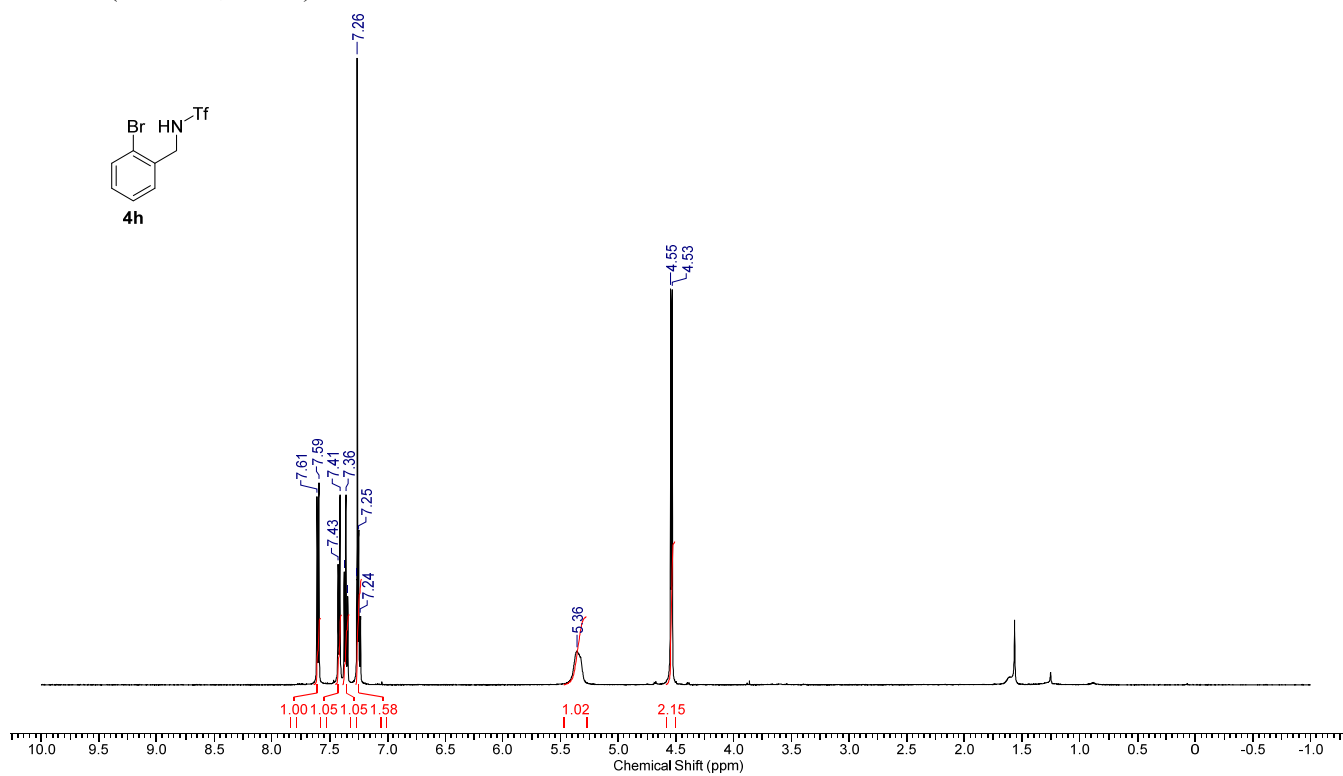

<sup>13</sup>C NMR (125 MHz, CDCl<sub>3</sub>) of **4h**

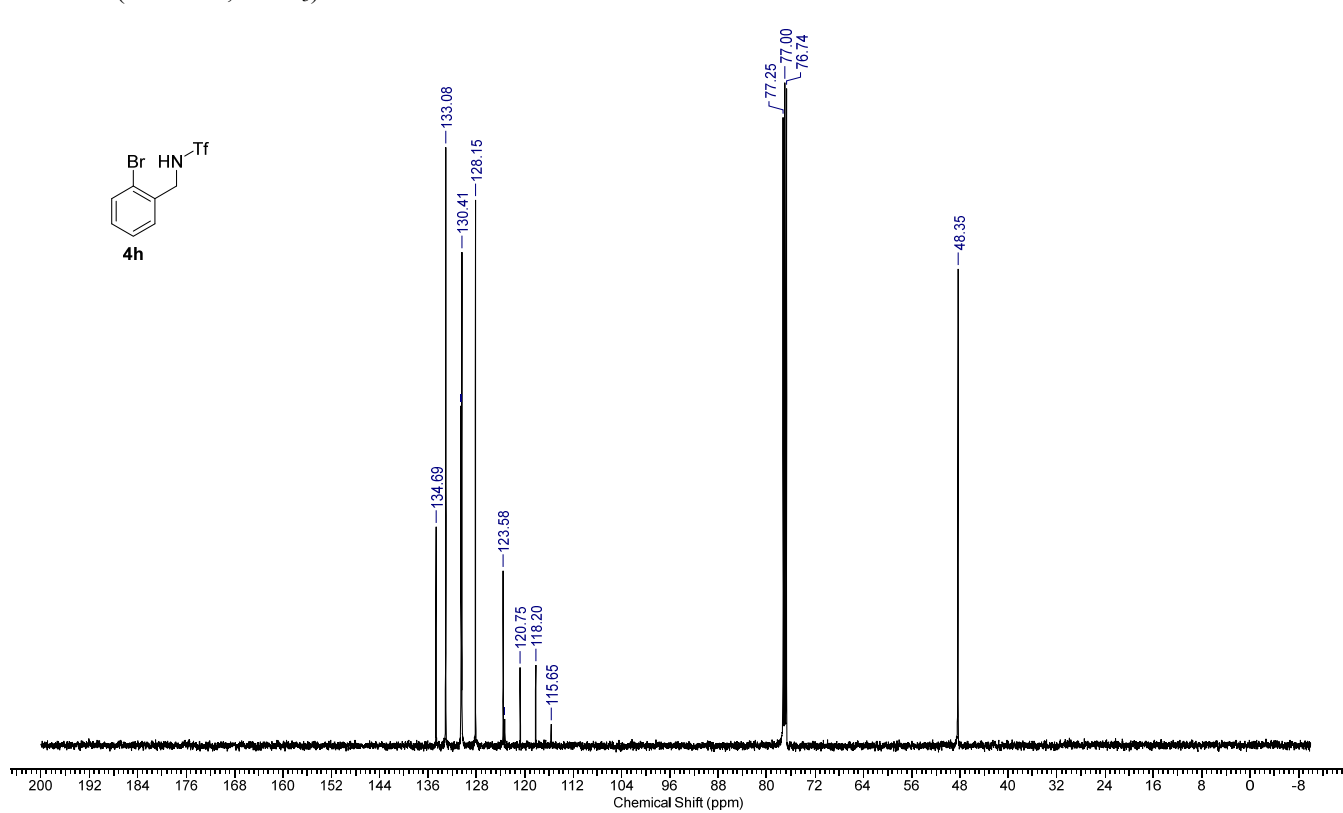

<sup>1</sup>H NMR (500 MHz, CDCl<sub>3</sub>) of **4i**

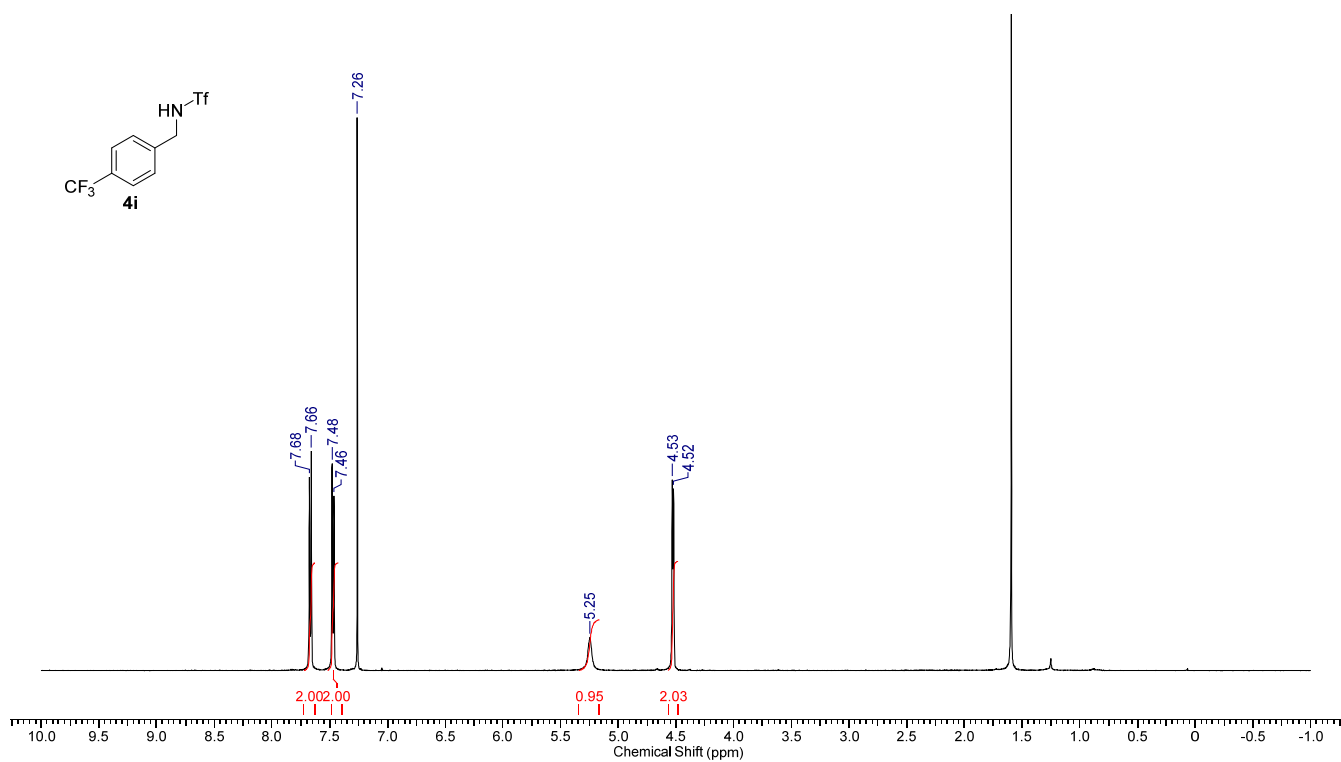

<sup>13</sup>C NMR (125 MHz, CDCl<sub>3</sub>) of **4i**

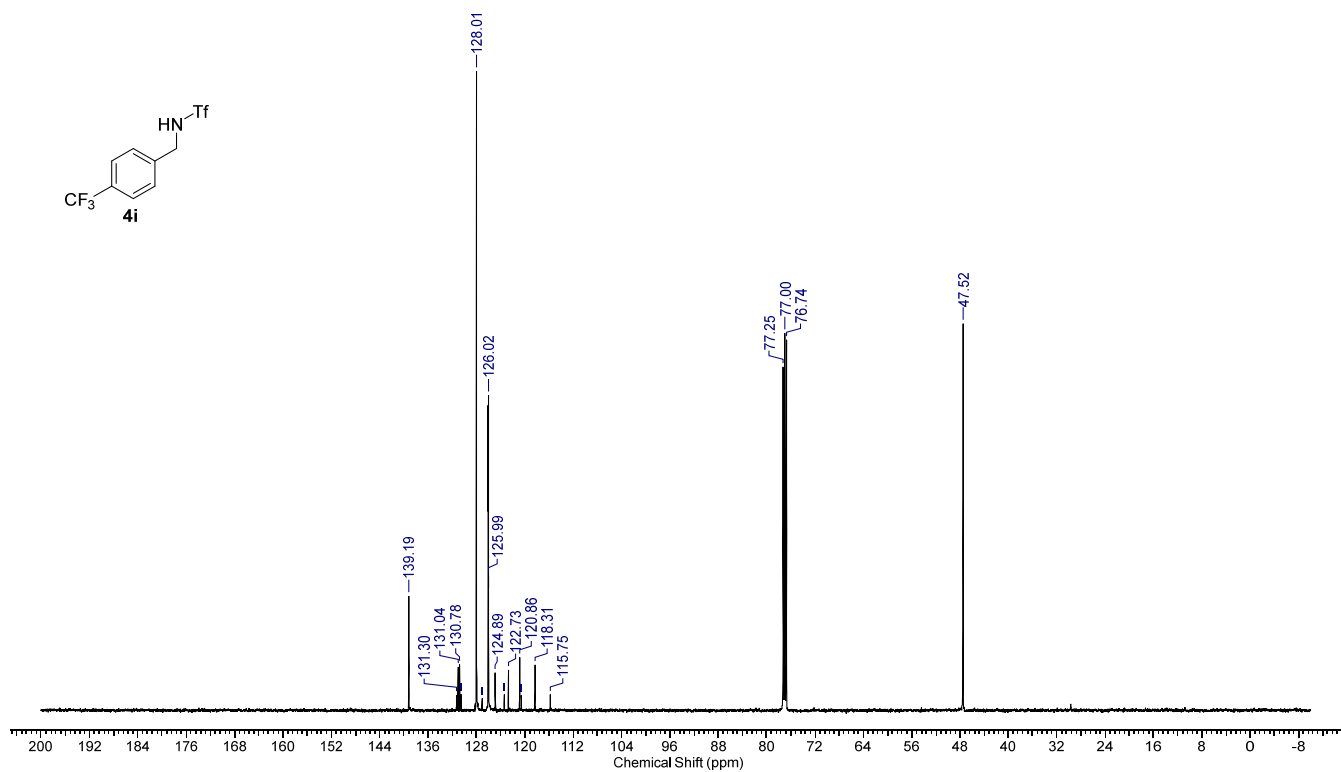

<sup>1</sup>H NMR (500 MHz, CDCl<sub>3</sub>) of **4j**

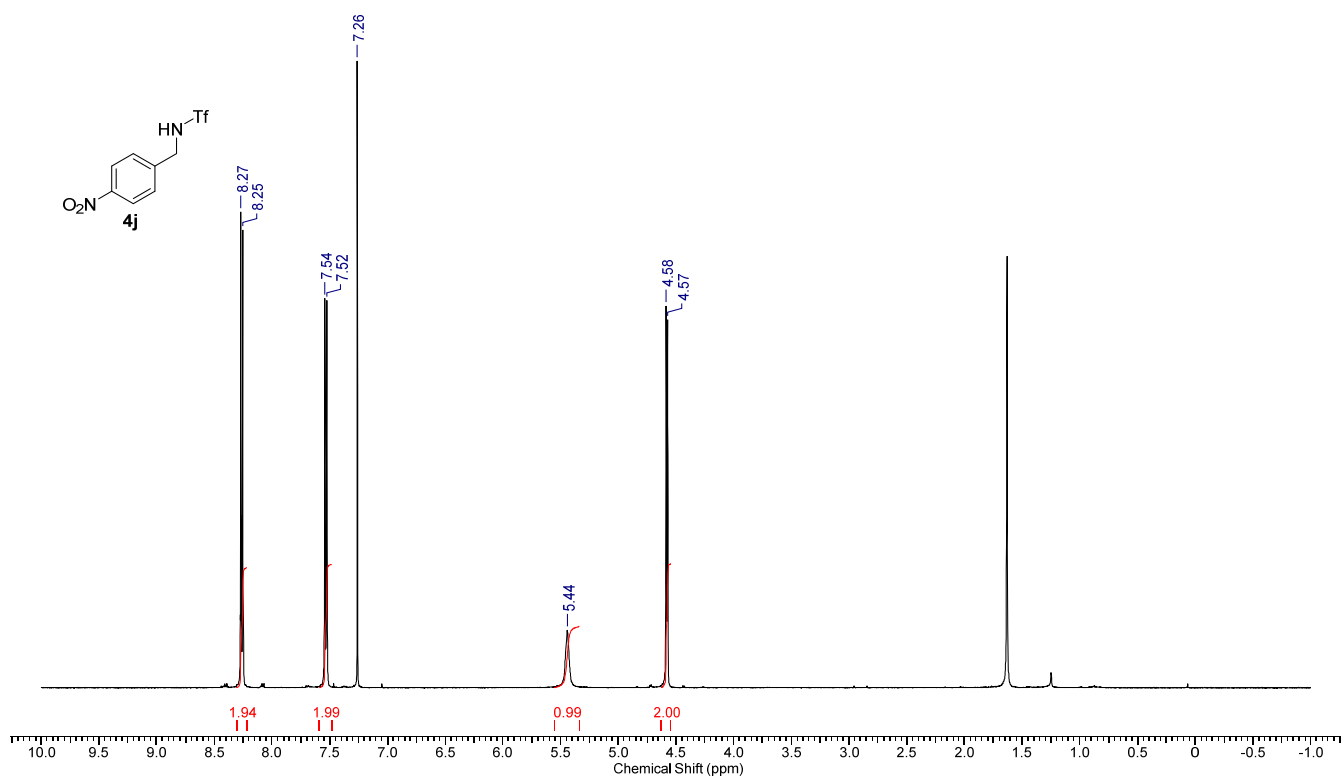

<sup>13</sup>C NMR (125 MHz, CDCl<sub>3</sub>) of **4j**

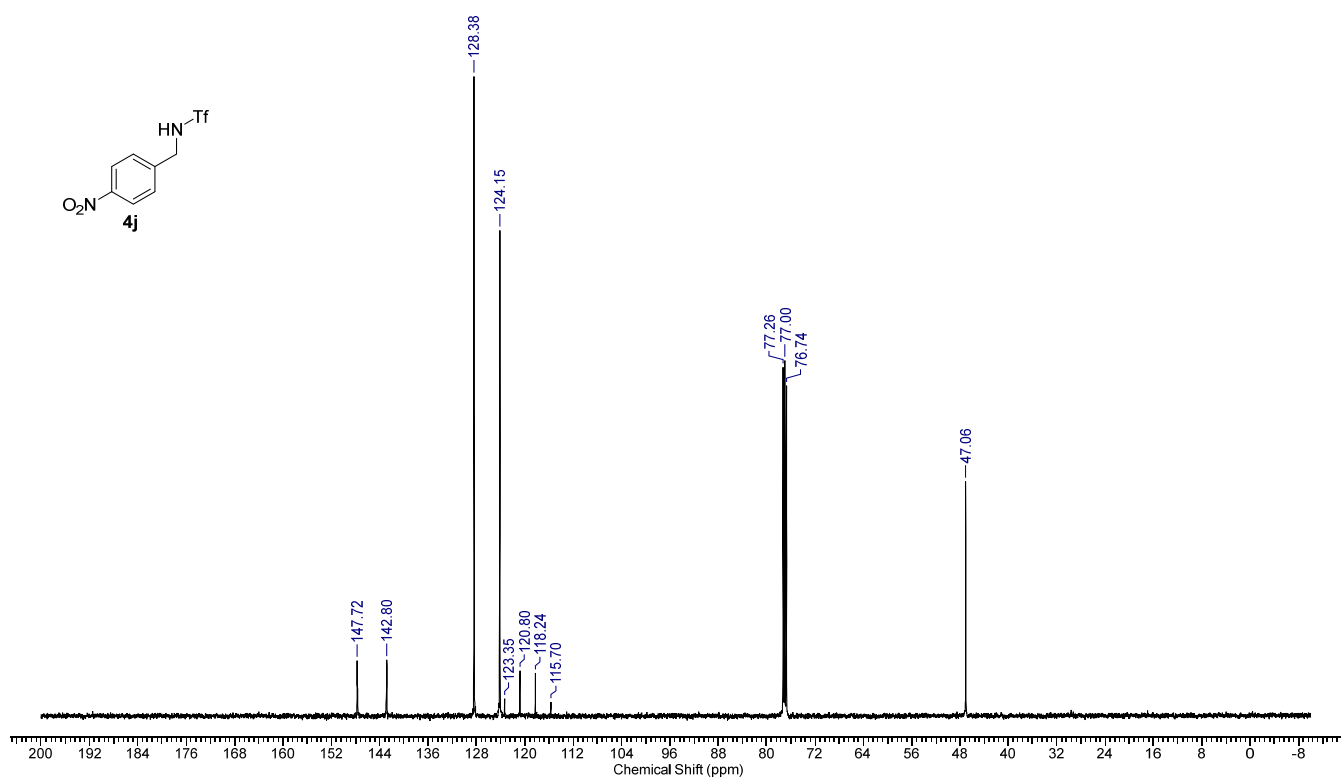



<sup>1</sup>H NMR (500 MHz, CDCl<sub>3</sub>) of **4k**

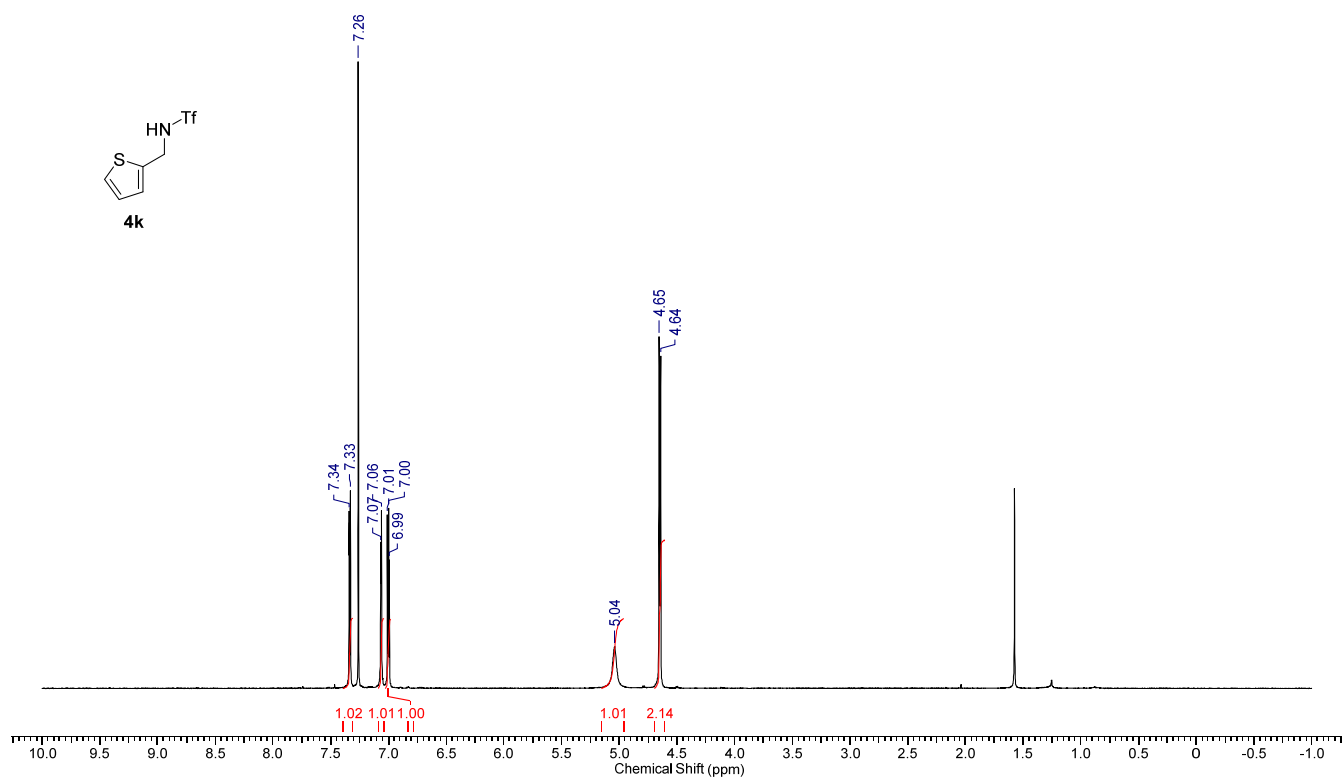

<sup>13</sup>C NMR (125 MHz, CDCl<sub>3</sub>) of **4k**

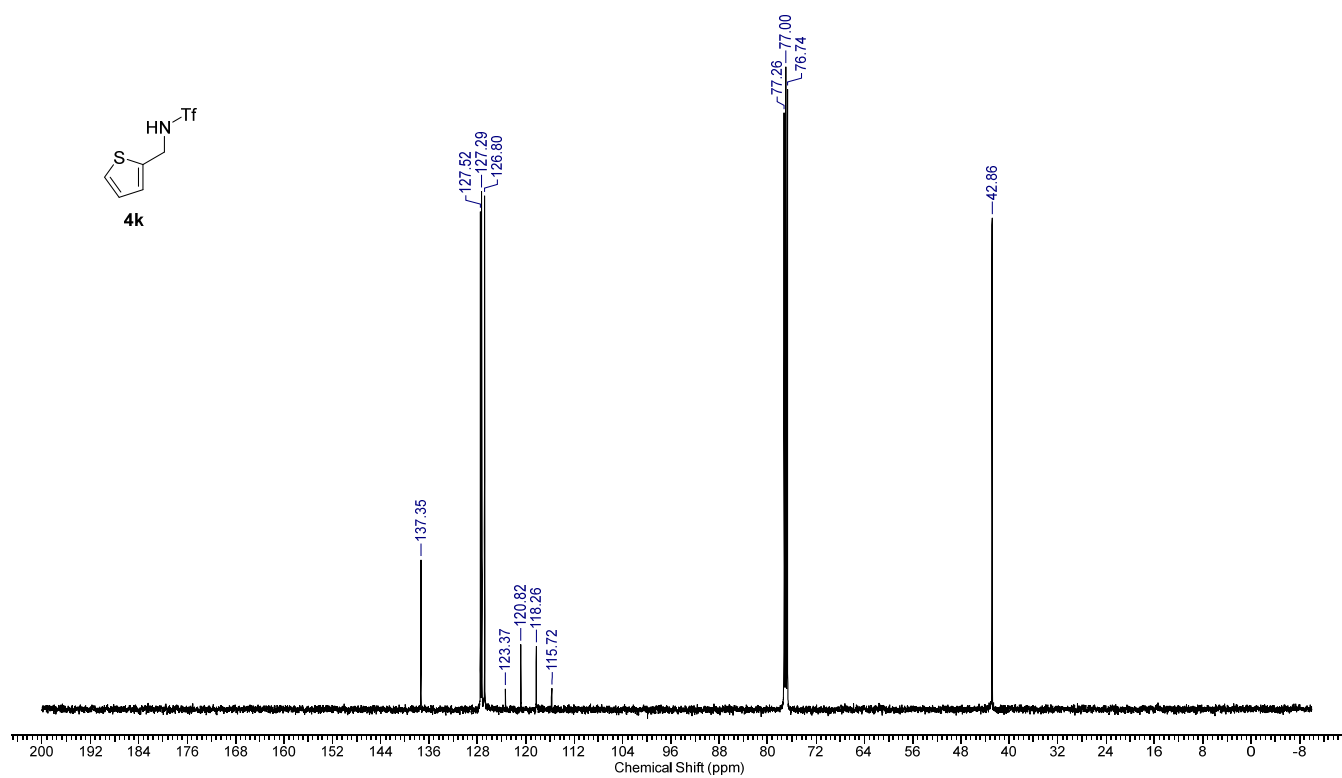

<sup>1</sup>H NMR (500 MHz, CDCl<sub>3</sub>) of **4I**

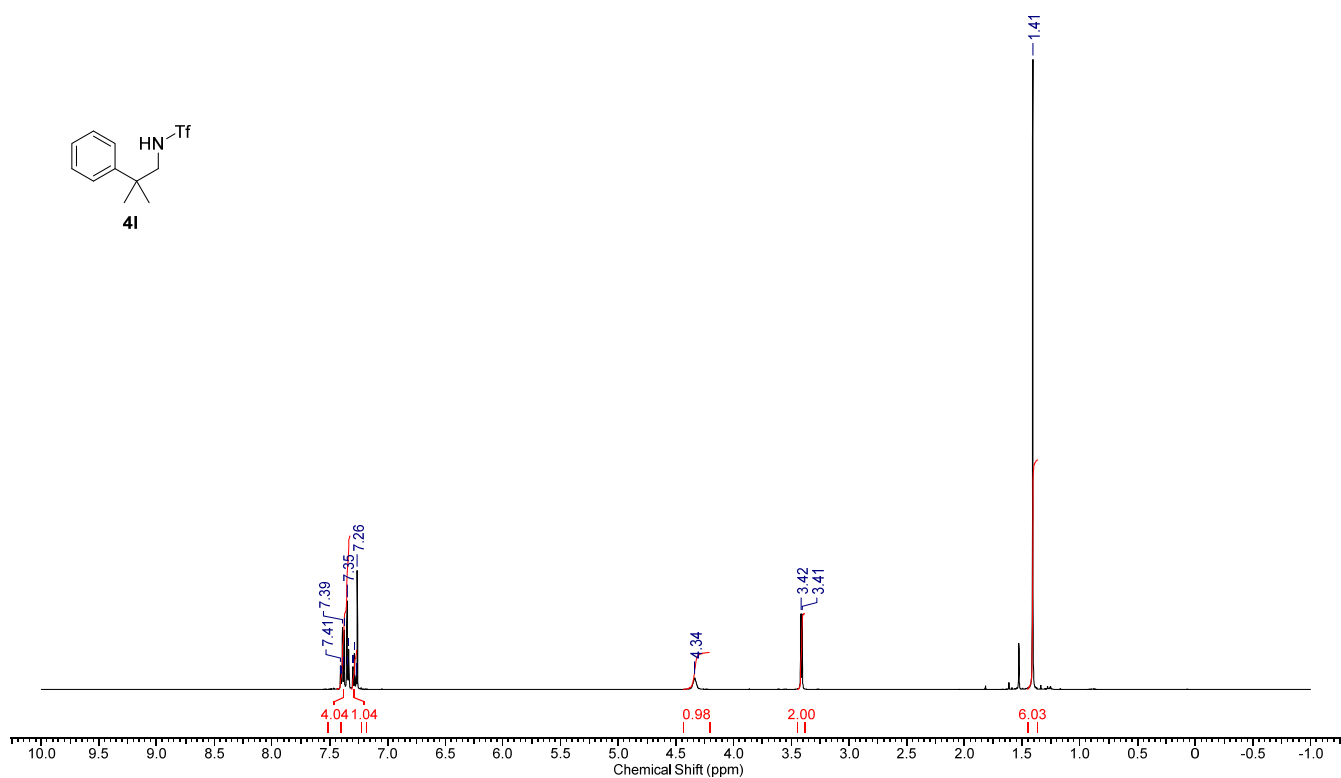

<sup>13</sup>C NMR (125 MHz, CDCl<sub>3</sub>) of **4I**

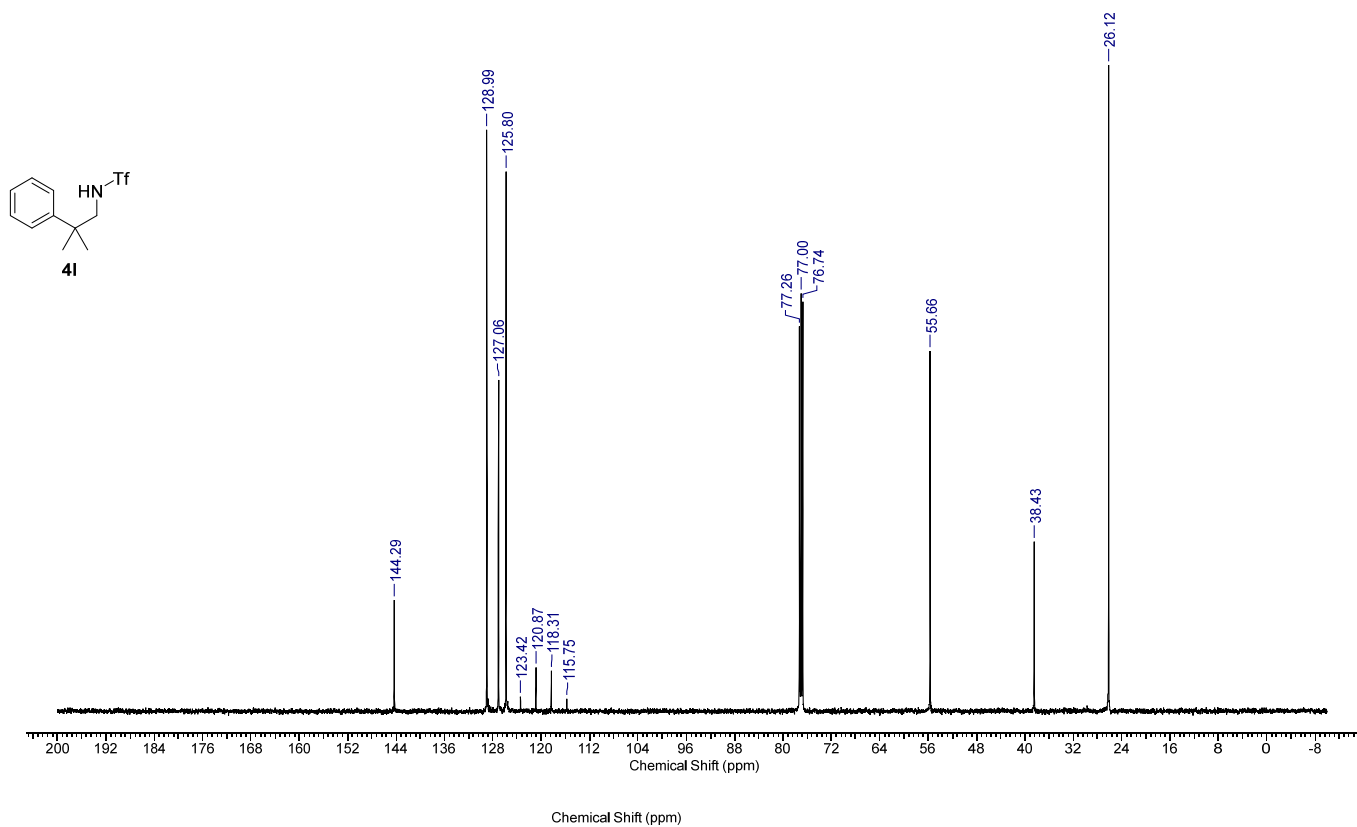

<sup>1</sup>H NMR (500 MHz, CDCl<sub>3</sub>) of **6**

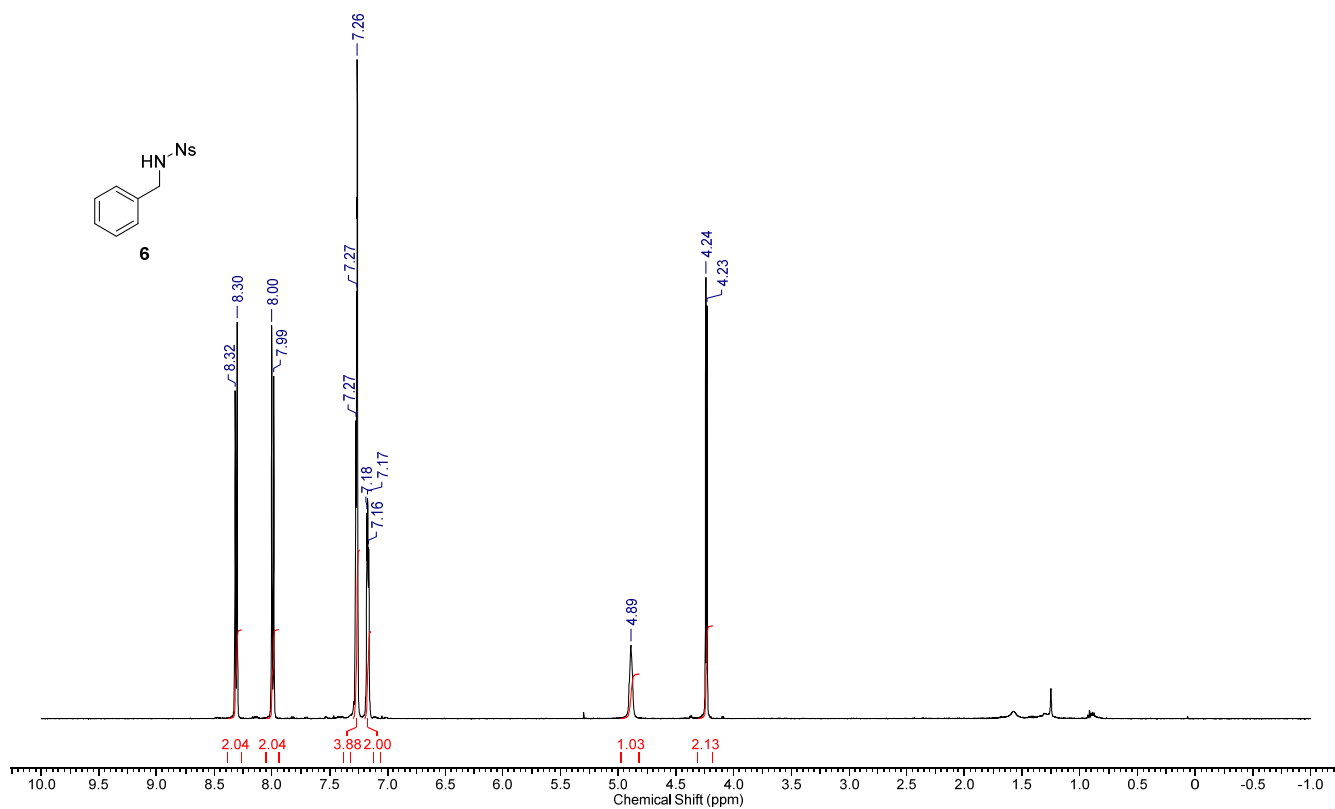

<sup>13</sup>C NMR (125 MHz, CDCl<sub>3</sub>) of **6**

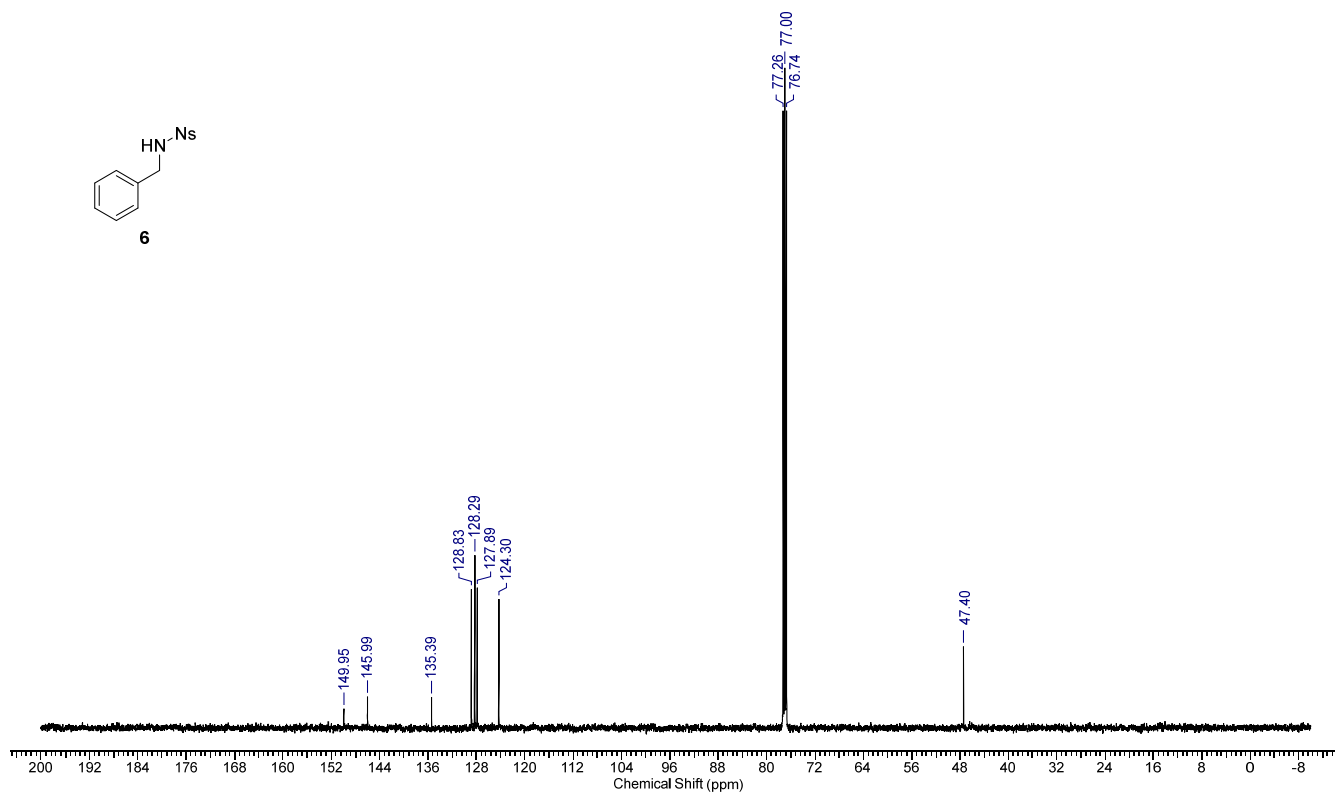

<sup>1</sup>H NMR (500 MHz, CDCl<sub>3</sub>) of 7

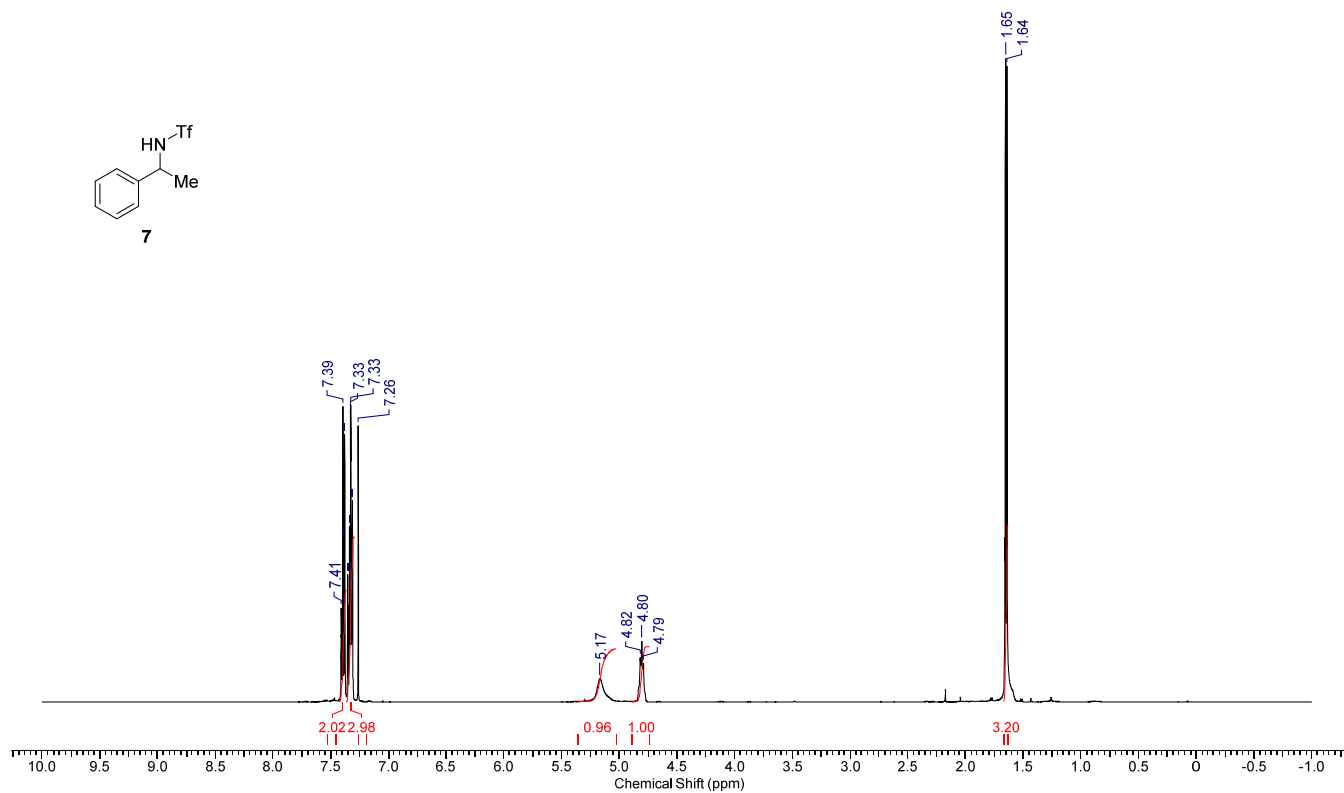

<sup>13</sup>C NMR (125 MHz, CDCl<sub>3</sub>) of 7

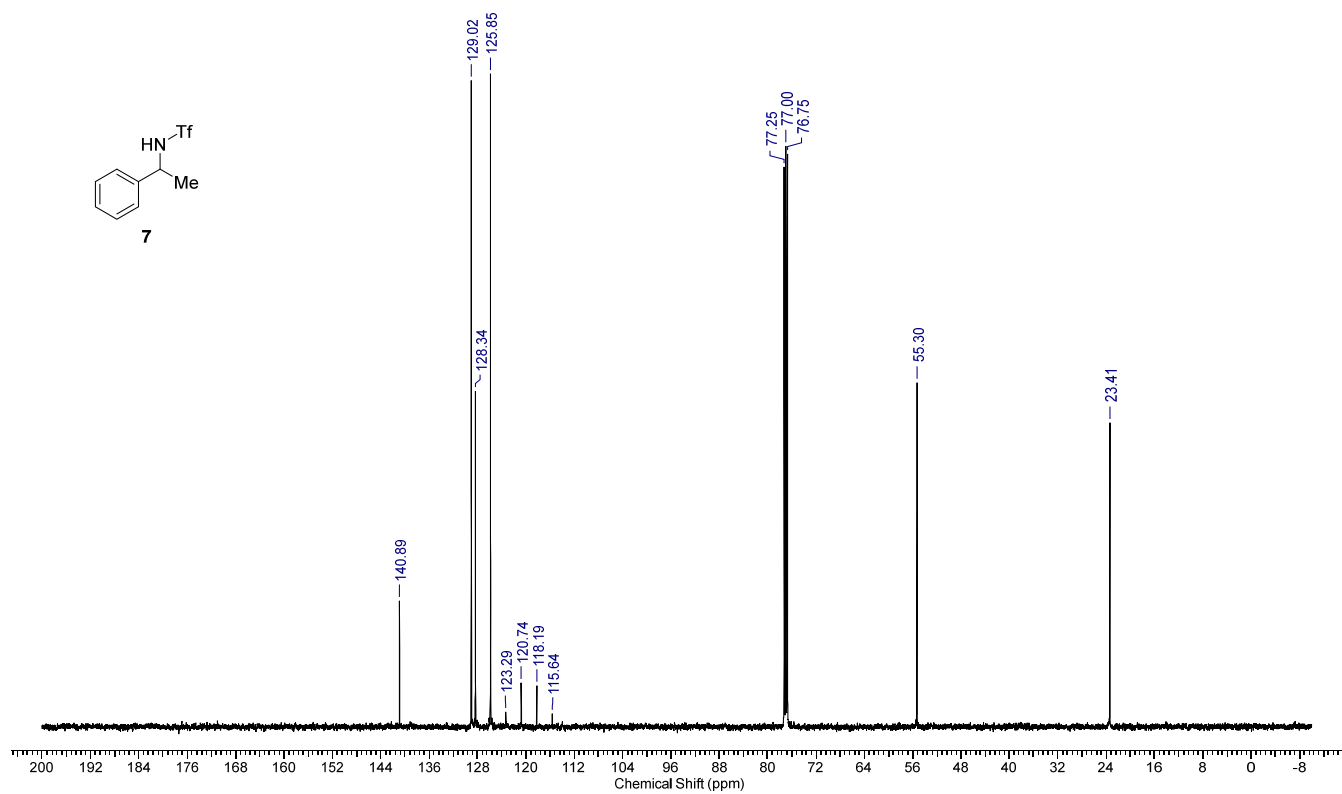

$^1\text{H}$  NMR (500 MHz,  $\text{CDCl}_3$ ) of **8**

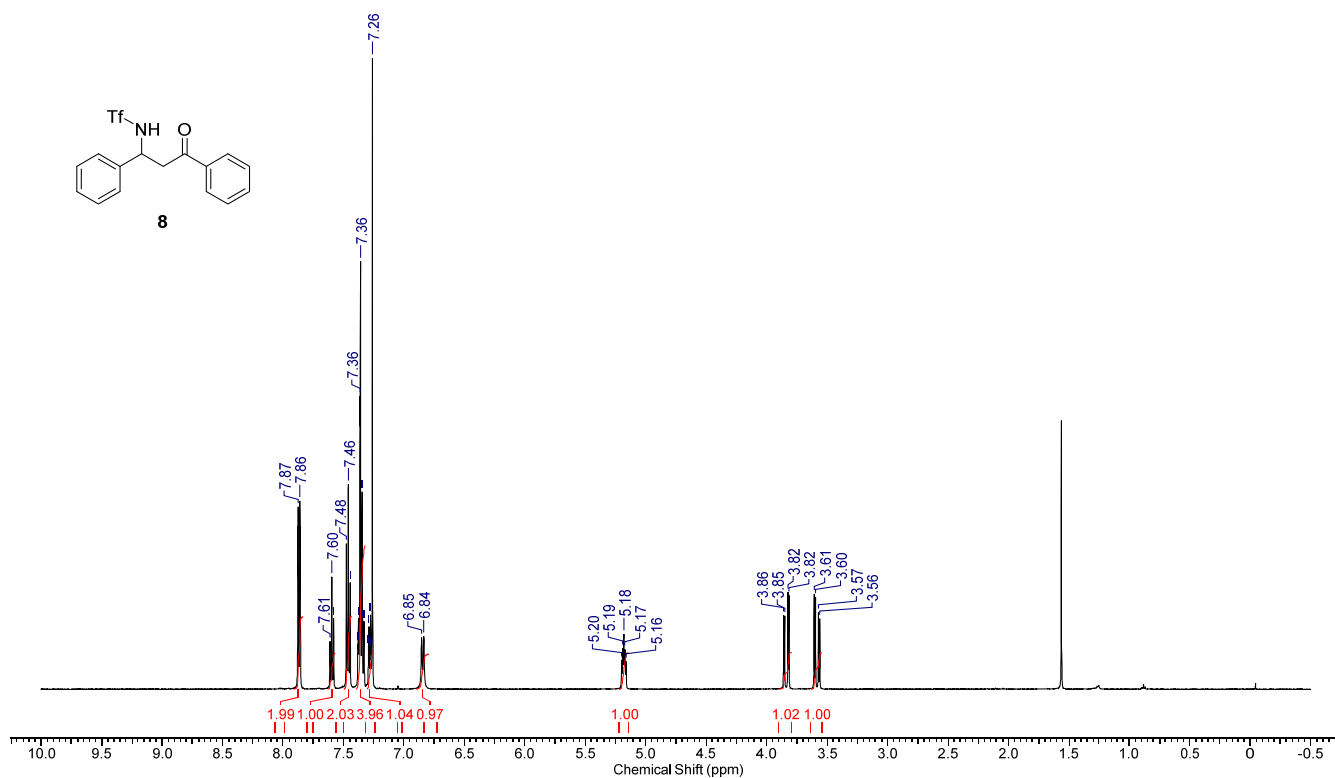

$^{13}\text{C}$  NMR (125 MHz,  $\text{CDCl}_3$ ) of **8**

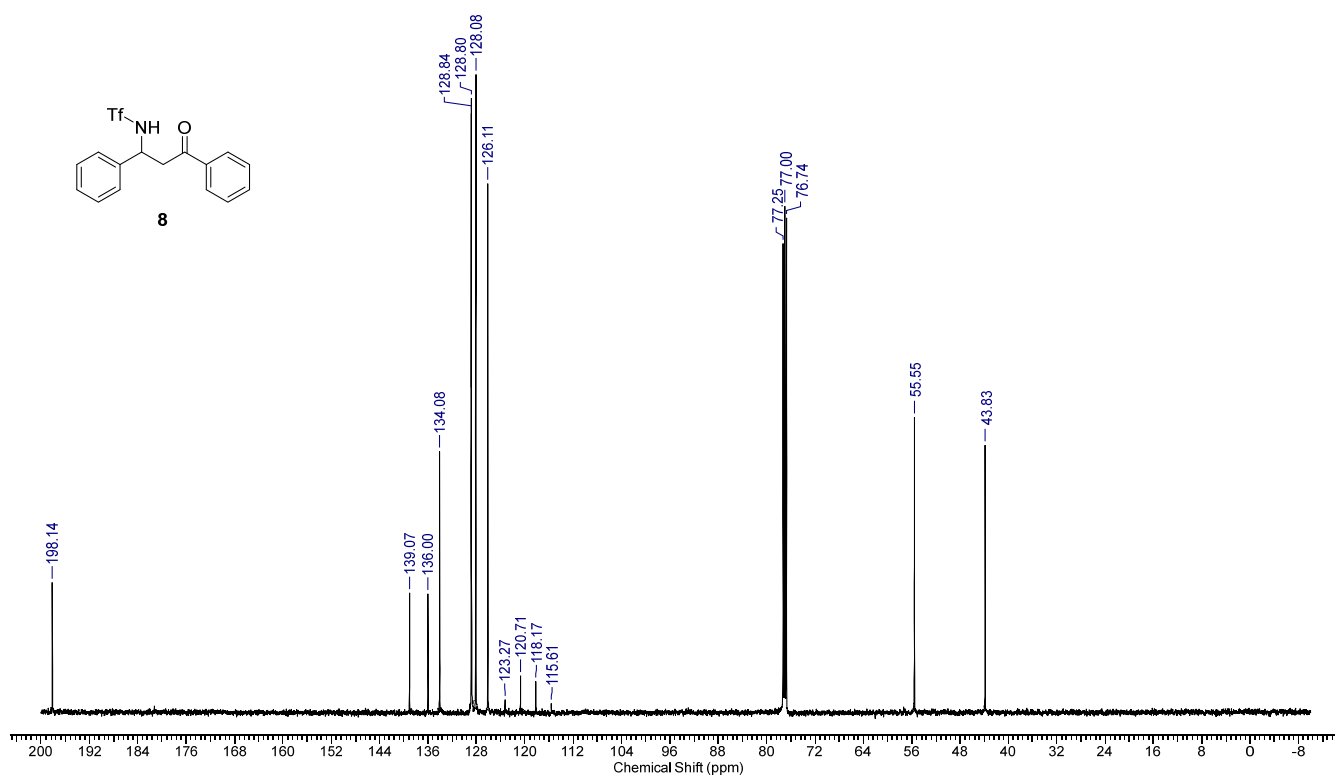

<sup>1</sup>H NMR (500 MHz, CDCl<sub>3</sub>) of **9**

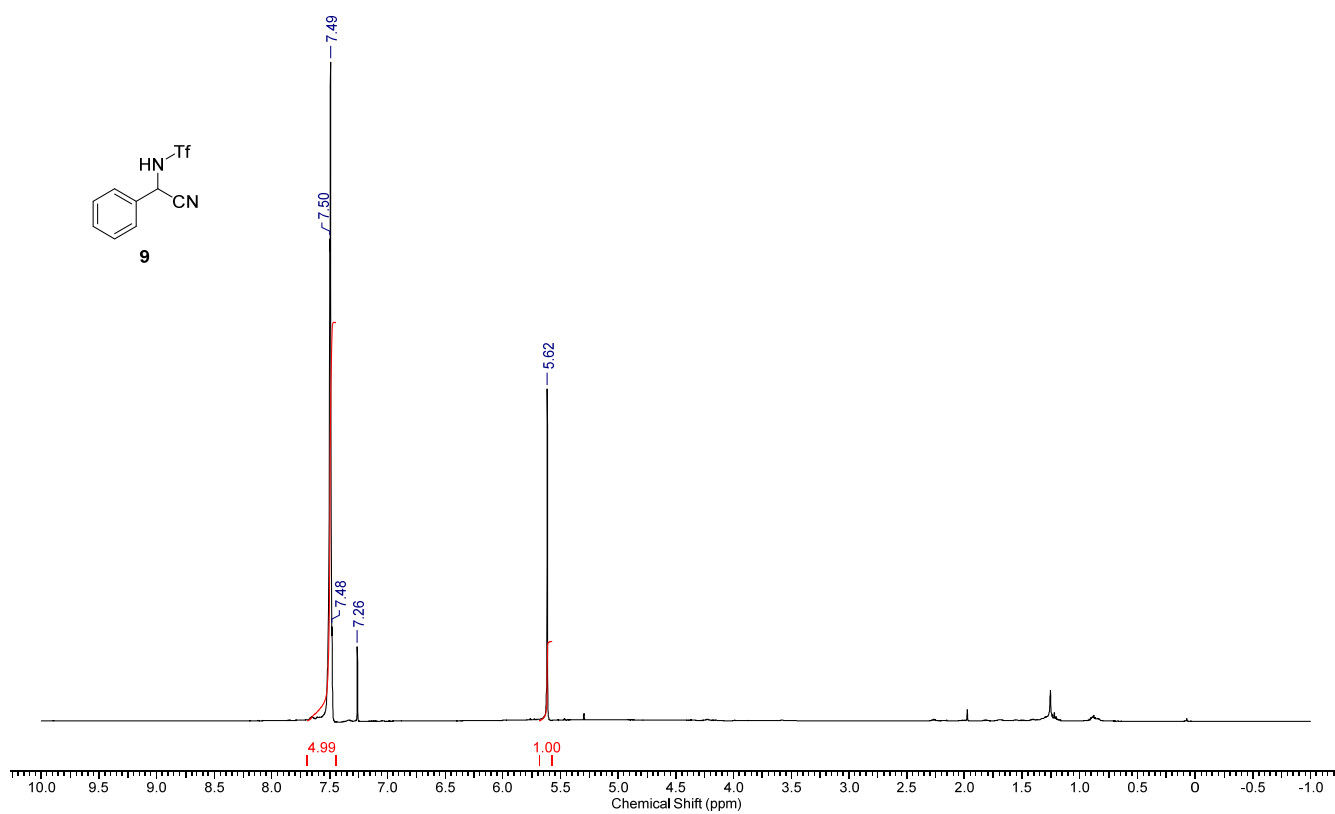

<sup>13</sup>C NMR (125 MHz, CDCl<sub>3</sub>) of **9**

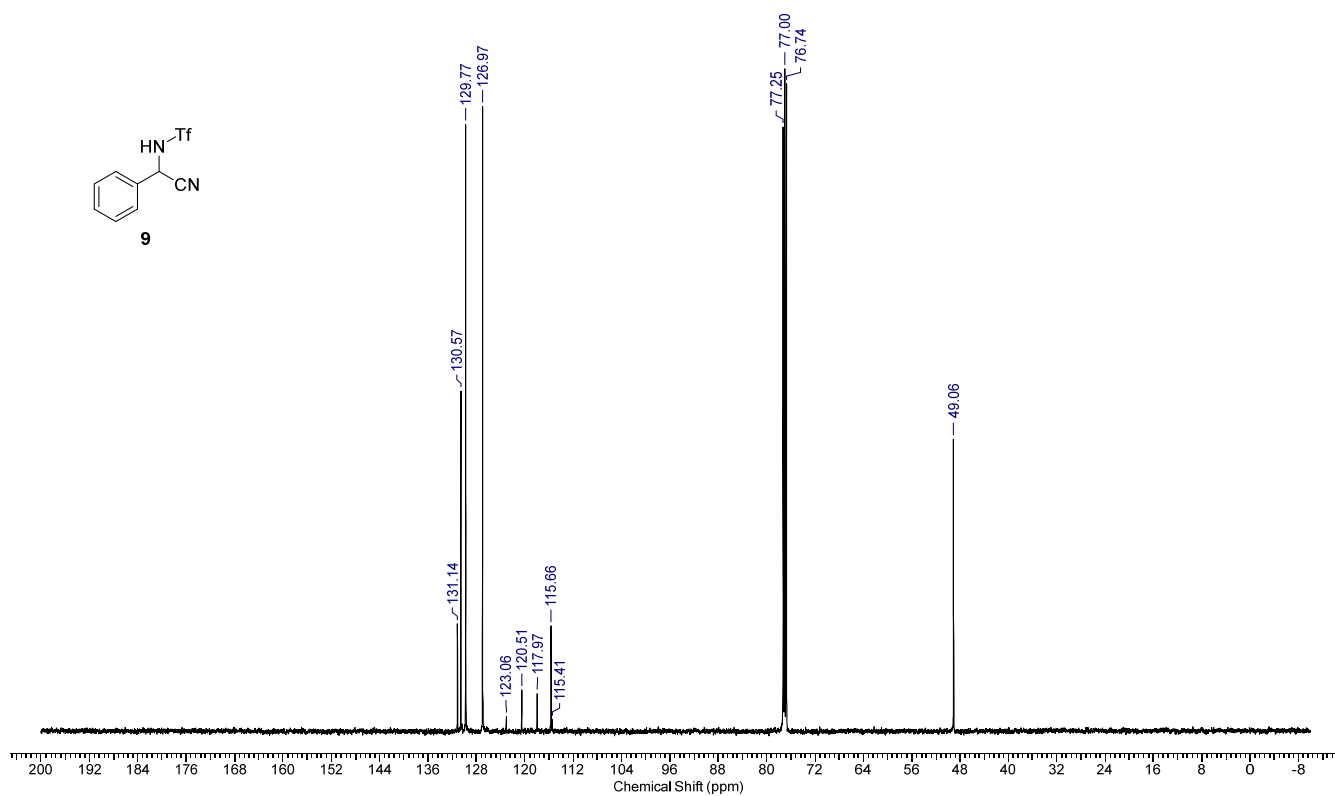

## 6. <sup>19</sup>F NMR Spectra of 4a-4h and 6-9

<sup>19</sup>F NMR (470 MHz, CDCl<sub>3</sub>) of 4a

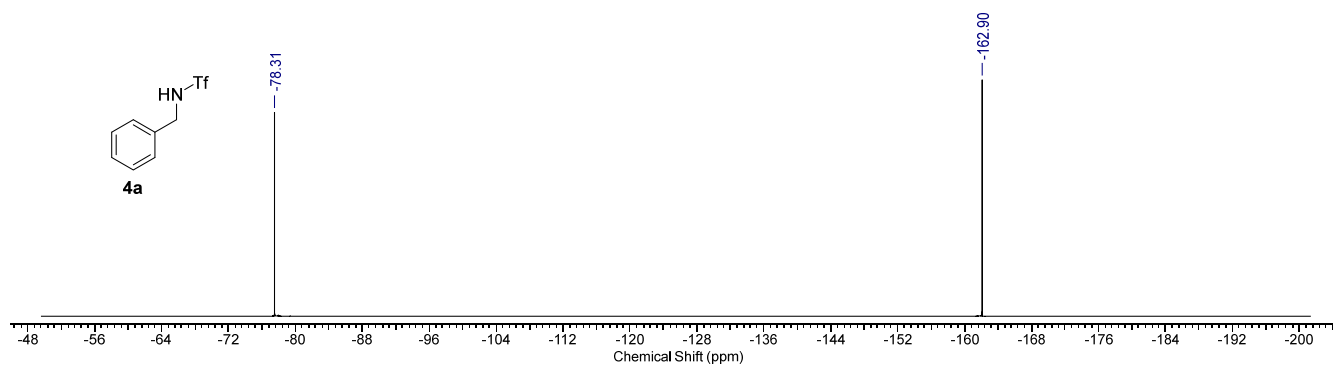

<sup>19</sup>F NMR (470 MHz, CDCl<sub>3</sub>) of 4b

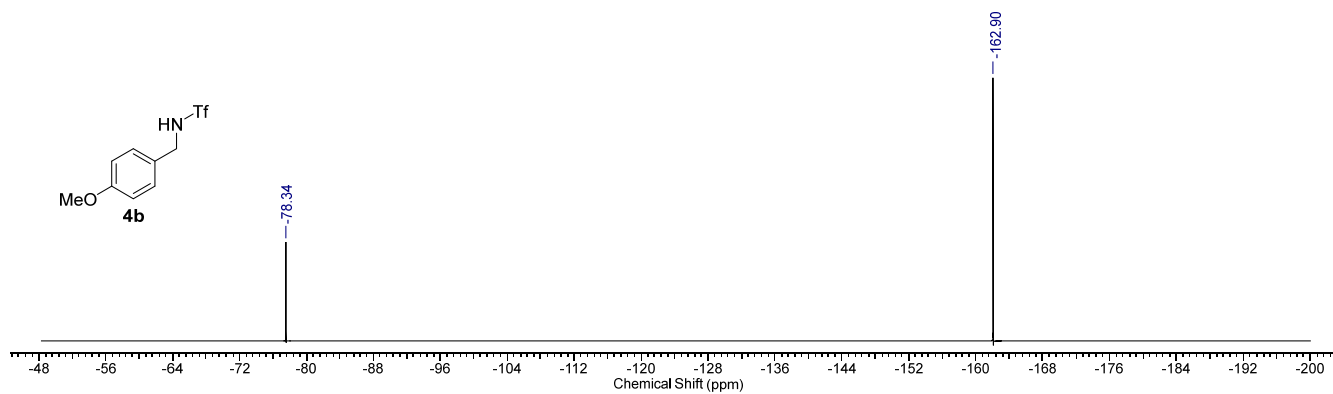

<sup>19</sup>F NMR (470 MHz, CDCl<sub>3</sub>) of 4c

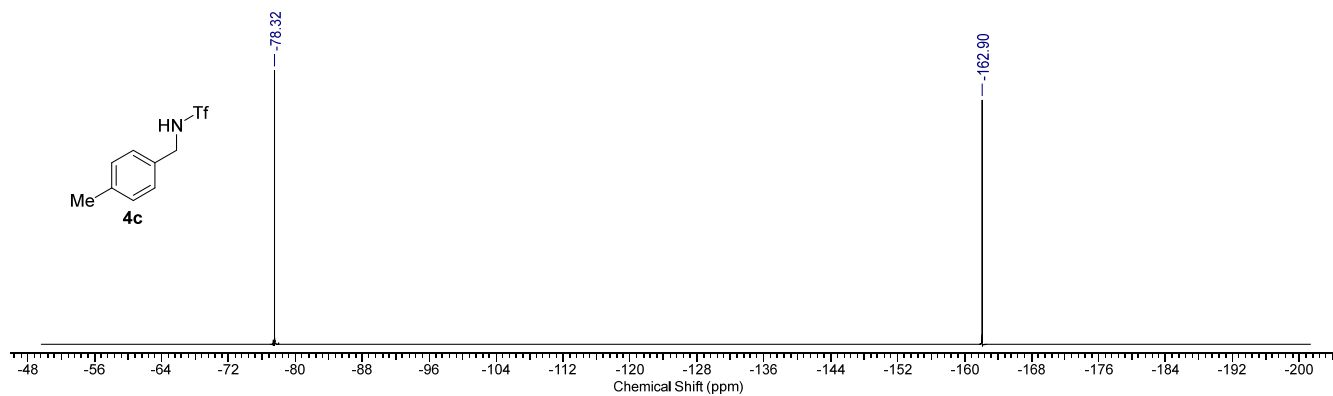

<sup>19</sup>F NMR (470 MHz, CDCl<sub>3</sub>) of 4d

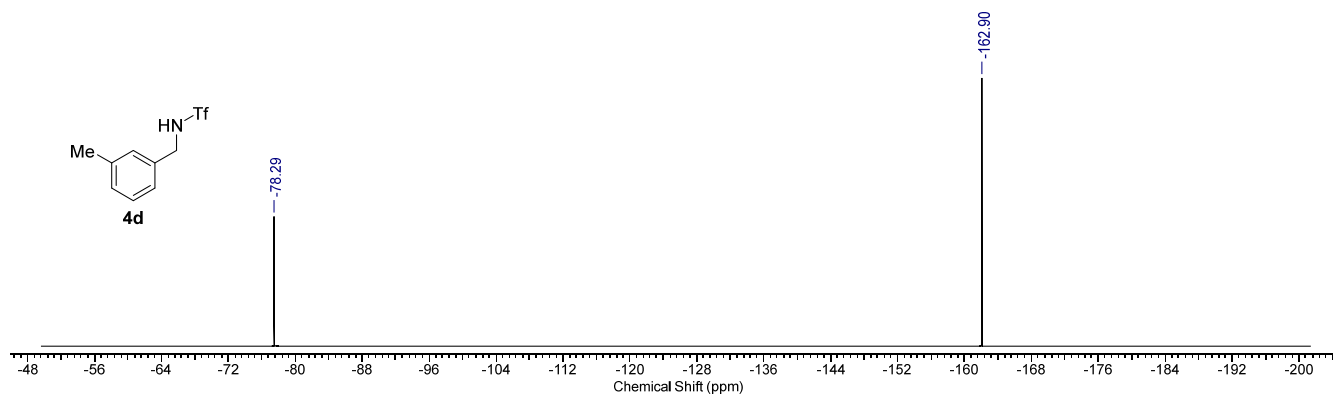

$^{19}\text{F}$  NMR (470 MHz,  $\text{CDCl}_3$ ) of **4e**

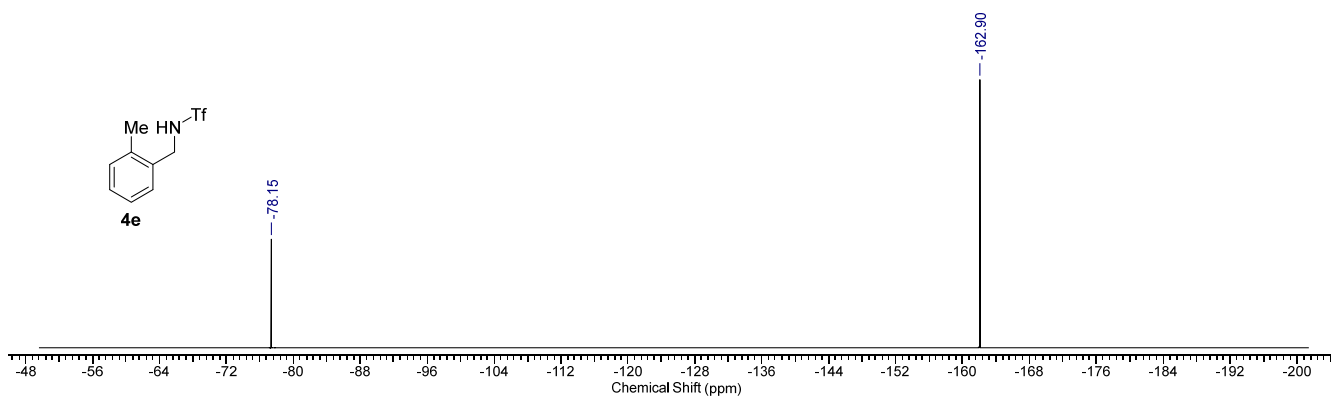

$^{19}\text{F}$  NMR (470 MHz,  $\text{CDCl}_3$ ) of **4f**

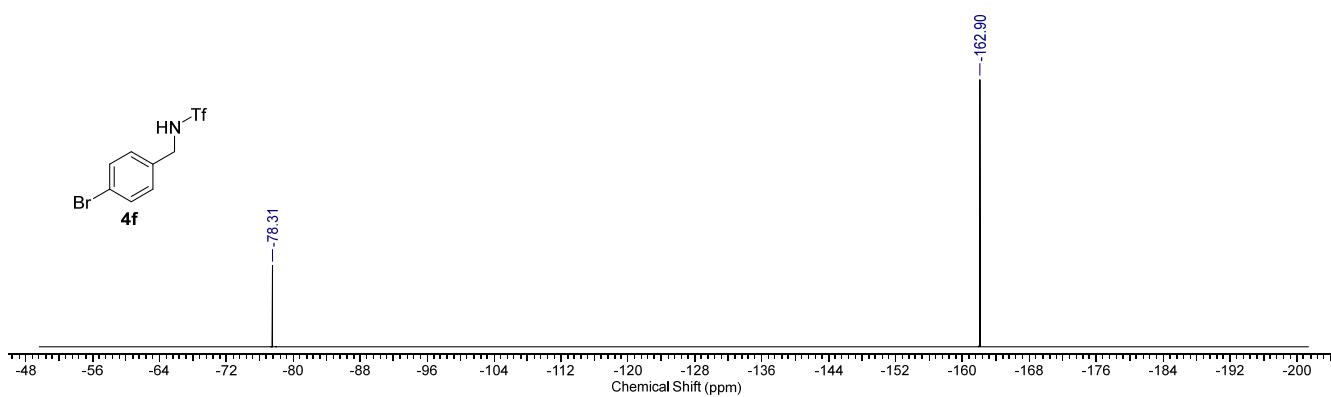

$^{19}\text{F}$  NMR (470 MHz,  $\text{CDCl}_3$ ) of **4g**

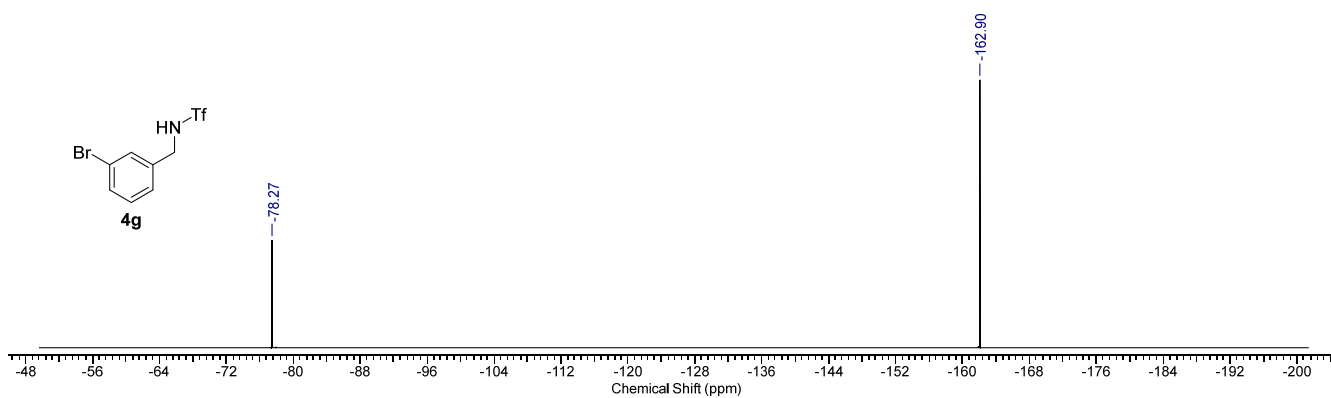

$^{19}\text{F}$  NMR (470 MHz,  $\text{CDCl}_3$ ) of **4h**

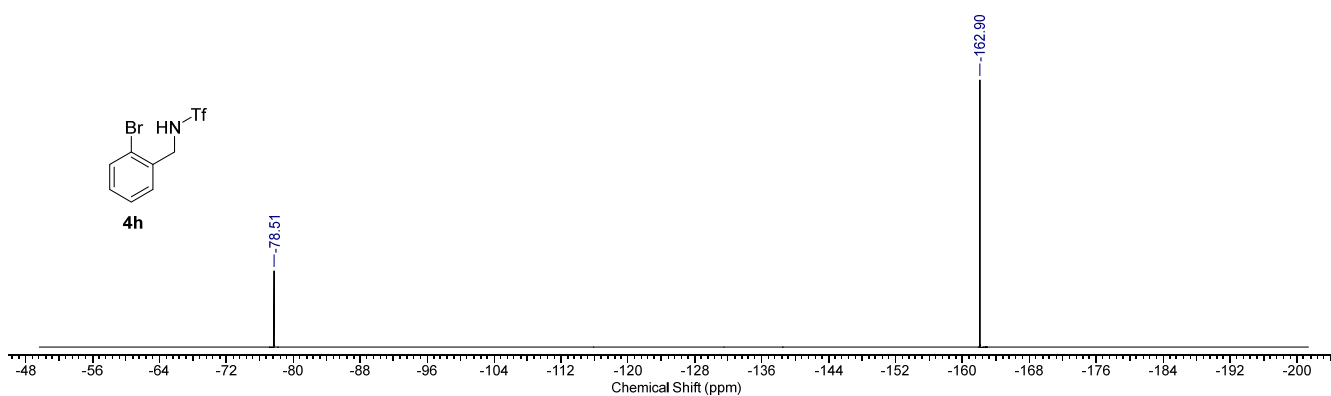



$^{19}\text{F}$  NMR (470 MHz,  $\text{CDCl}_3$ ) of **4i**

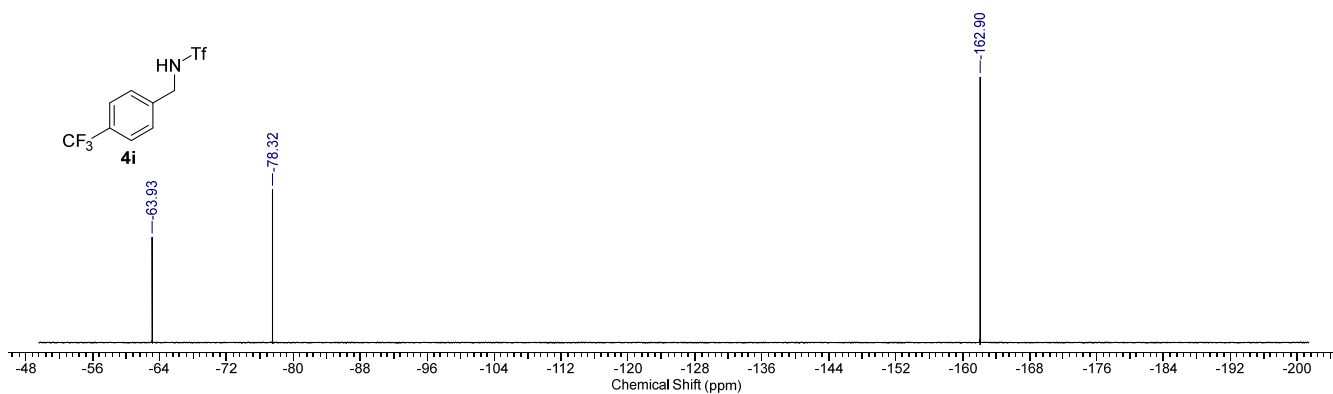

$^{19}\text{F}$  NMR (470 MHz,  $\text{CDCl}_3$ ) of **4j**

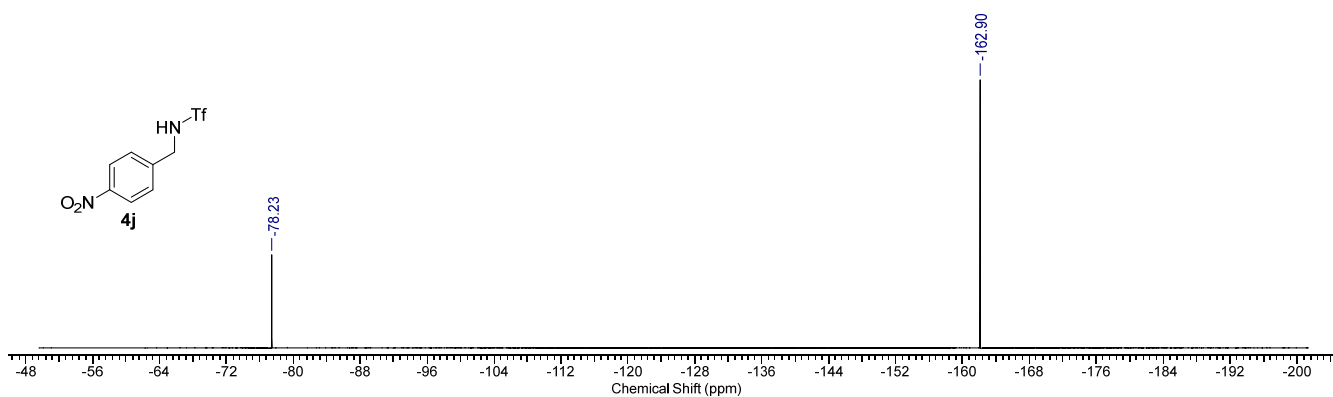

$^{19}\text{F}$  NMR (470 MHz,  $\text{CDCl}_3$ ) of **4k**

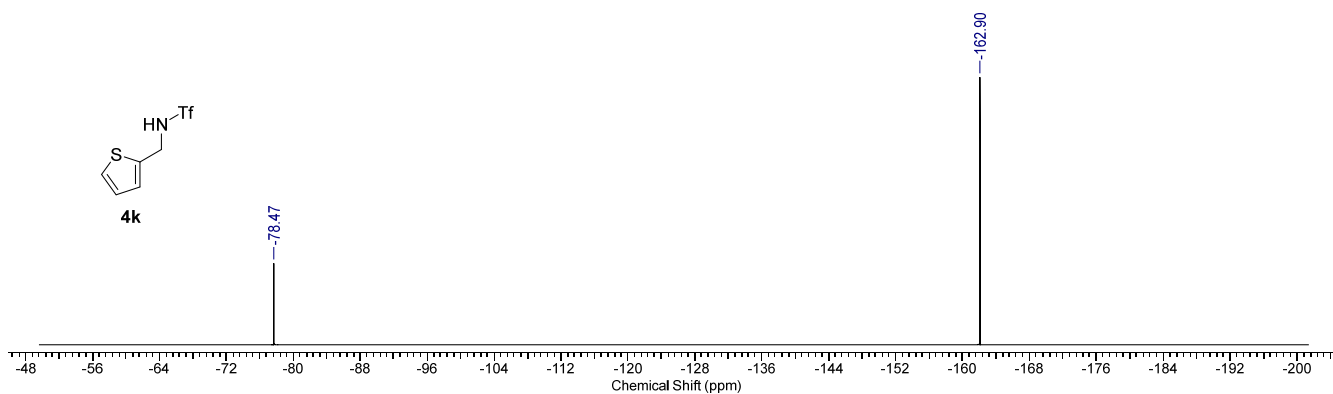

$^{19}\text{F}$  NMR (470 MHz,  $\text{CDCl}_3$ ) of **4l**

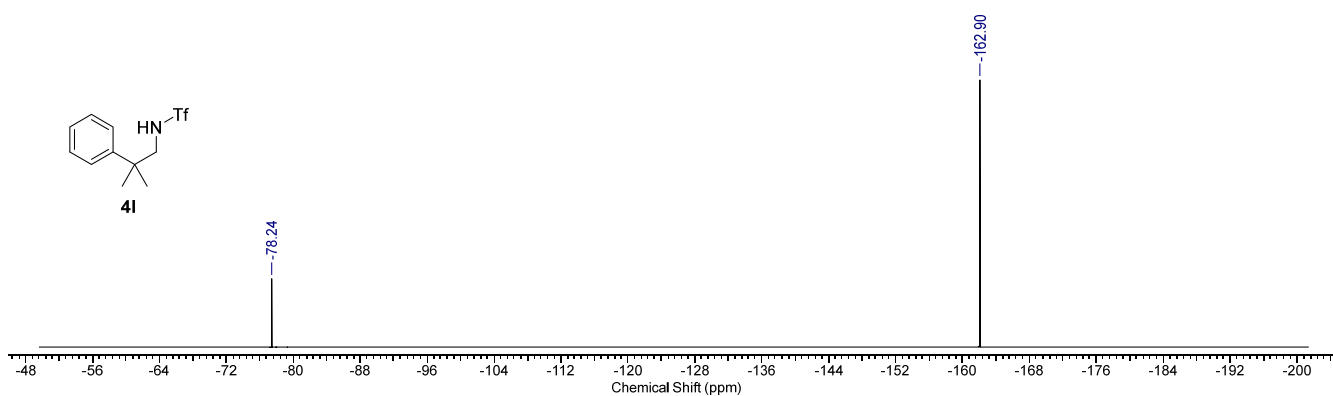

$^{19}\text{F}$  NMR (470 MHz,  $\text{CDCl}_3$ ) of **7**

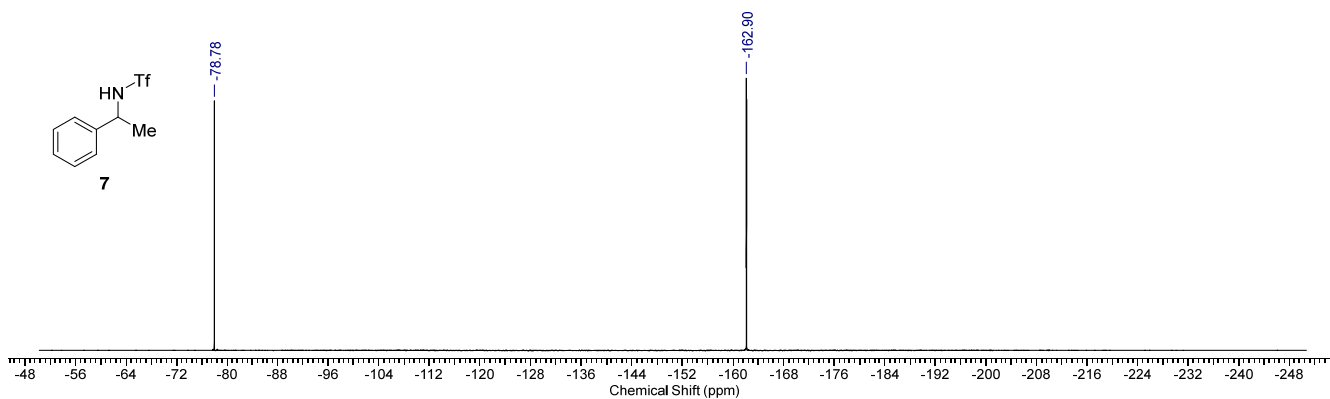

$^{19}\text{F}$  NMR (470 MHz,  $\text{CDCl}_3$ ) of **8**

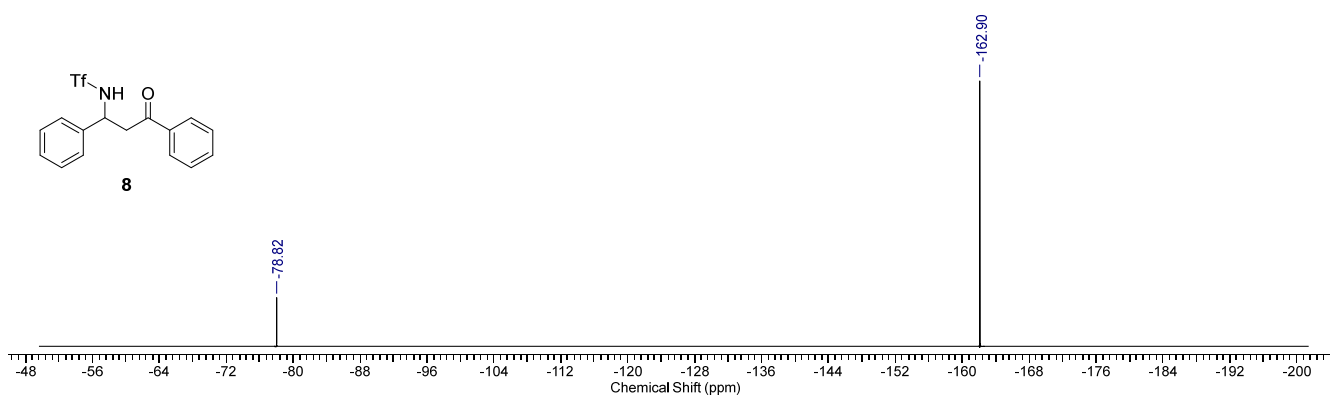

$^{19}\text{F}$  NMR (470 MHz,  $\text{CDCl}_3$ ) of **9**

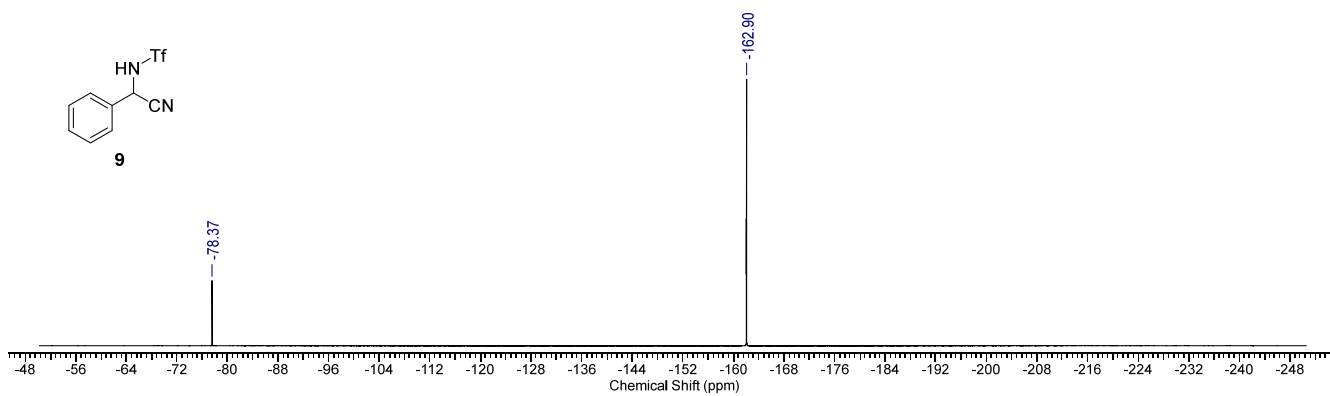

Supplement: d4qo00875h1.pdf [file d4qo00875h1.pdf]
